1 De novo organelle biogenesis in the cyanobacterium TDX16  
2 released from the green alga *Haematococcus pluvialis*

3 Qing-lin Dong\*, Xiang-ying Xing, Yang Han, Xiao-lin Wei, Shuo, Zhang

4 Department of Bioengineering, Hebei University of Technology, Tianjin 300130, China

5 \* Corresponding author

6 Email: [qldong@hebut.edu.cn](mailto:qldong@hebut.edu.cn)

7

8

9

10

11

12

13

14

15

16

## 17 **Abstract**

18 It is believed that eukaryotes arise from prokaryotes, which means that organelles can form in the  
19 latter. Such events, however, had not been observed previously. Here, we report the biogenesis of  
20 organelles in the endosymbiotic cyanobacterium TDX16 that escaped from its senescent/necrotic  
21 host cell of green alga *Haematococcus pluvialis*. In brief, organelle biogenesis in TDX16 initiated  
22 with cytoplasm compartmentalization, followed by de-compartmentalization, DNA allocation, and  
23 re-compartmentalization, as such two composite organelles-the primitive chloroplast and primitive  
24 nucleus sequestering minor and major fractions of cellular DNA respectively were formed.  
25 Thereafter, the eukaryotic cytoplasmic matrix was built up from the matrix extruded from the  
26 primitive nucleus; mitochondria were assembled in and segregated from the primitive chloroplast,  
27 whereby the primitive nucleus and primitive chloroplast matured into nucleus and chloroplast  
28 respectively; while most mitochondria turned into double-membraned vacuoles after matrix  
29 degradation. Results of pigment analyses, 16S rRNA and genome sequencing revealed that  
30 TDX16 is a phycocyanin-containing cyanobacterium resembling *Chroococcidiopsis thermalis*,  
31 which had acquired 9,017,401bp DNAs with 10301 genes from its host. Therefore, organelle  
32 biogenesis in TDX16 was achieved by hybridizing the acquired eukaryotic DNAs with its own  
33 ones and expressing the hybrid genome.

34 Organelle biogenesis in TDX16 results in its transition into a new eukaryotic alga TDX16-DE,  
35 which provides a reference to re-understand the development, structure, function and association  
36 of organelles in eukaryotes and the reasons behind them, and has implications on other sections of  
37 biology, particularly cancer biology and evolutionary biology: (1) the formation and maturation of  
38 the small organelle-less nascent cancer cells share striking similarities with TDX16 development  
39 and transition, so, it is most likely that cancer cells arise from bacteria; (2) organelle biogenesis in  
40 TDX16 uncovers a way of new organelle and new single-celled eukaryote formation, and in light  
41 of which, the ancestral organelles were likely formed in rather than transformed from the  
42 endosymbiotic prokaryotes that had acquired their hosts' DNAs.

43 **Key words:** Organelle biogenesis; Cyanobacterium; DNA acquisition; Hybridization; Transition

44

45

## 46 Introduction

47 All cells are structurally categorized into two groups: eukaryotic cells and prokaryotic cells.  
48 Eukaryotic cells contain membrane-bounded organelles. These organelles were once thought to  
49 develop only by fission of the preexisting ones, while recent studies show that Golgi apparatus [1],  
50 peroxisomes [2-5], lysosomes [6-8] and vacuoles [9-10] form de novo. By contrast, prokaryotic  
51 cells have no organelle, but are believed to be the ancestors of eukaryotic cells, which means that  
52 organelles can develop from scratch in the former. Such events, however, had not been observed  
53 previously for unknown reasons. It is possible that organelle biogenesis in prokaryotic cells occur  
54 in specific situations and finish in short time, which result in sudden transition of the prokaryotic  
55 cells into eukaryotic cells, and thus are hard to capture.

56 In our previous studies we found unexpectedly that the senescent/necrotic cells of unicellular  
57 green alga *Haematococcus pluvialis* (eukaryote) suddenly burst and liberated countless small blue  
58 endosymbiotic cyanobacterial cells (TDX16) in the adverse conditions of high temperature and  
59 low irradiance (Fig. S1) [11].

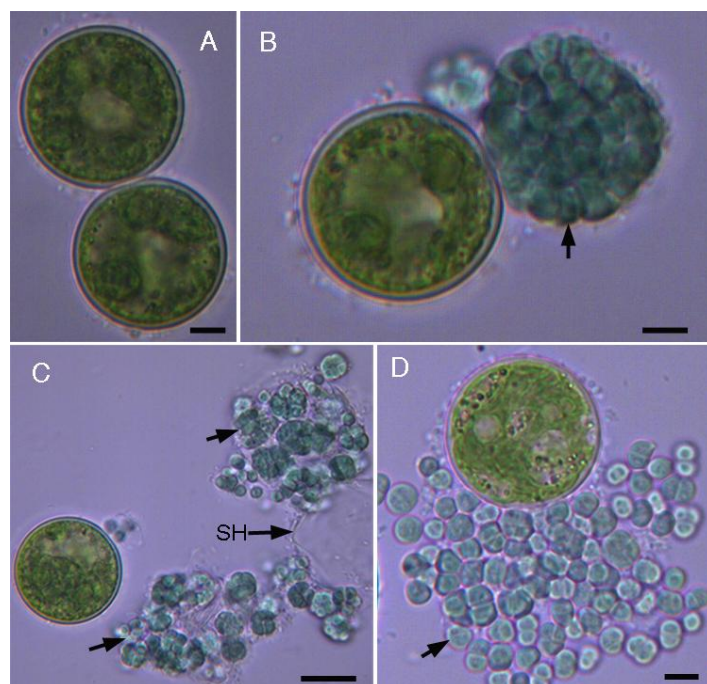

60  
61 **Fig. S1. Light microscopic images of TDX16 liberation from the senescent *Haematococcus pluvialis* cell.** (A) Two large senescent *H.*  
62 *pluvialis* cells, scale bar 5 $\mu$ m. (B) One senescent *H. pluvialis* cell suddenly burst and liberated a massive equal-sized blue spheroid (arrow)  
63 consisting of countless TDX16 cells, scale bar 5 $\mu$ m. (C) The transparent covering sheath (SH) of the blue spheroid ruptured, and thus the  
64 blue spheroid collapsed into many cell clumps (arrow), scale bar 10 $\mu$ m. (D) The compacted TDX16 cells in the cell clumps disaggregated,  
65 which were enclosed within the sporangia (arrow), scale bar 5 $\mu$ m. Cells were observed with a light microscope BK6000 (Optec, China).  
66 Microphotographs were taken under the objective lens (40 $\times$ ) using a DV E3 630 camera.

67 Transmission electron microscopic observations revealed that tiny premature TDX16 cells with  
68 unique electron-dense heterogenous globular bodies (HGBs) multiplied by asymmetric division  
69 within the enclosing sheaths (sporangia) in the senescent/necrotic *H. pluvialis* cell (host) and  
70 subsequently grew up into small thylakoids-less endospore-producing TDX16 cells filling up the  
71 dead host's cellular space (Fig. S2). The liberated small blue TDX16 cells are relatively stable in  
72 the dim light, but turn readily into small green algal cells as light intensity elevated [12]. The time  
73 required for TDX16's transition is short and negatively related to light intensity, which is about 10  
74 days at  $60 \mu\text{mol photons m}^{-2} \text{ s}^{-1}$ . Whereas irradiance above  $60 \mu\text{mol photons m}^{-2} \text{ s}^{-1}$  is lethal to  
75 TDX16, causing massive cell death.

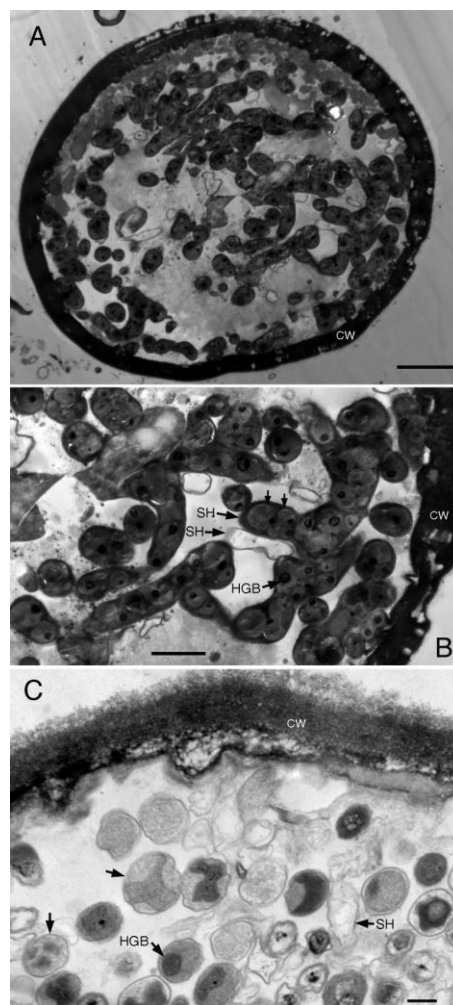

76  
77 **Fig. S2. Transmission electron microscopic images of TDX16 proliferation and development in the senescent/necrotic *H. pluvialis***  
78 **cell. (A)** Tiny premature TDX16 cells proliferated within a senescent/necrotic *H. pluvialis* cell, whose organelles had dissolved, remaining  
79 only an intact cell wall (CW), scale bar  $5\mu\text{m}$ . **(B)** Detail from (A), tiny TDX16 cells (arrow) with electron-dense heterogenous globular  
80 bodies (HGBs) multiplied by asymmetric division within and escaped from the enclosing sheaths (sporangia) (arrow), scale bar  $2\mu\text{m}$ . **(C)**  
81 Tiny TDX16 cells grew up into small thylakoid-less DTX16 cells filling up the cellular space of the dead *H. pluvialis* cell. The small  
82 TDX16 cells multiplied by formation of endospores within the sporangia (arrow), scale bar  $0.2\mu\text{m}$ .

83 The unprecedented transition of cyanobacterium TDX16 cells into green algal cells enable us to  
84 get a real understanding of organelle biogenesis in prokaryotic cells. Hence, this research aims to  
85 study how and why organelles form in TDX16.

## 86 **Results**

### 87 **Light microscopic observation of TDX16-to-alga transition**

88 At the beginning, TDX16 cells were blue in color and reproduced by binary fission within the  
89 sporangia, containing more or less small grey vesicles (day 1, Fig. 1A). In the following day (day  
90 2, Fig.1B) TDX16 cells turned pale blue-green and began to escape from the ruptured sporangia  
91 leaving remnant sheaths (ruptured sporangia). With time, all TDX16 cells escaped from the  
92 sporangia, which no longer divided but enlarged, rounded up and turned a little bit more blue,  
93 while the intracellular grey vesicles became nearly indistinguishable (Fig. 1C, day 3).  
94 Subsequently, TDX16 cells turned slightly yellow, in which small white vesicles began to form  
95 (Fig. 1D, day 4) and increase in number and size (Fig. 1E, day 5). As such most TDX16 cells  
96 contained several small or medium-sized white vesicles, and occasionally a newly-formed small  
97 blue vesicle (Fig. F, day 6). Radical changes occurred on day 7 (Fig. 1G): TDX16 cells turned  
98 green, in which large blue vesicles and large white vesicles formed. Thereafter, the large blue and  
99 white vesicles shrank and disappeared in TDX16 cells, while parietal chloroplasts similar to those  
100 of green algae developed in some of the last type cells (day 8, Fig. 1H). When the large blue and  
101 white vesicles disappeared completely, chloroplasts formed in most TDX16 cells but were still  
102 under development in the rest ones (day 9, Fig. 1I). Ultimately, all TDX16 cells turned into green  
103 algal cells (TDX16-DE), containing one single giant chloroplast and multiplying by formation of  
104 autospores (autosporulation) (day 10, Fig. J). Such that, the color of TDX16 cultures changed  
105 from blue (day1) to green (day 10) (Fig. 1K).

### 106 **Transmission electron microscopic observation of organelle** 107 **biogenesis**

108 Consistent with our previous studies, light microscopic observation (Fig.1) showed unequivocally  
109 the transition of TDX16 cells into green algal cells as evidenced by the changes of cell color,  
110 morphology and reproduction mode as well as the formation of chloroplast. There is no doubt that

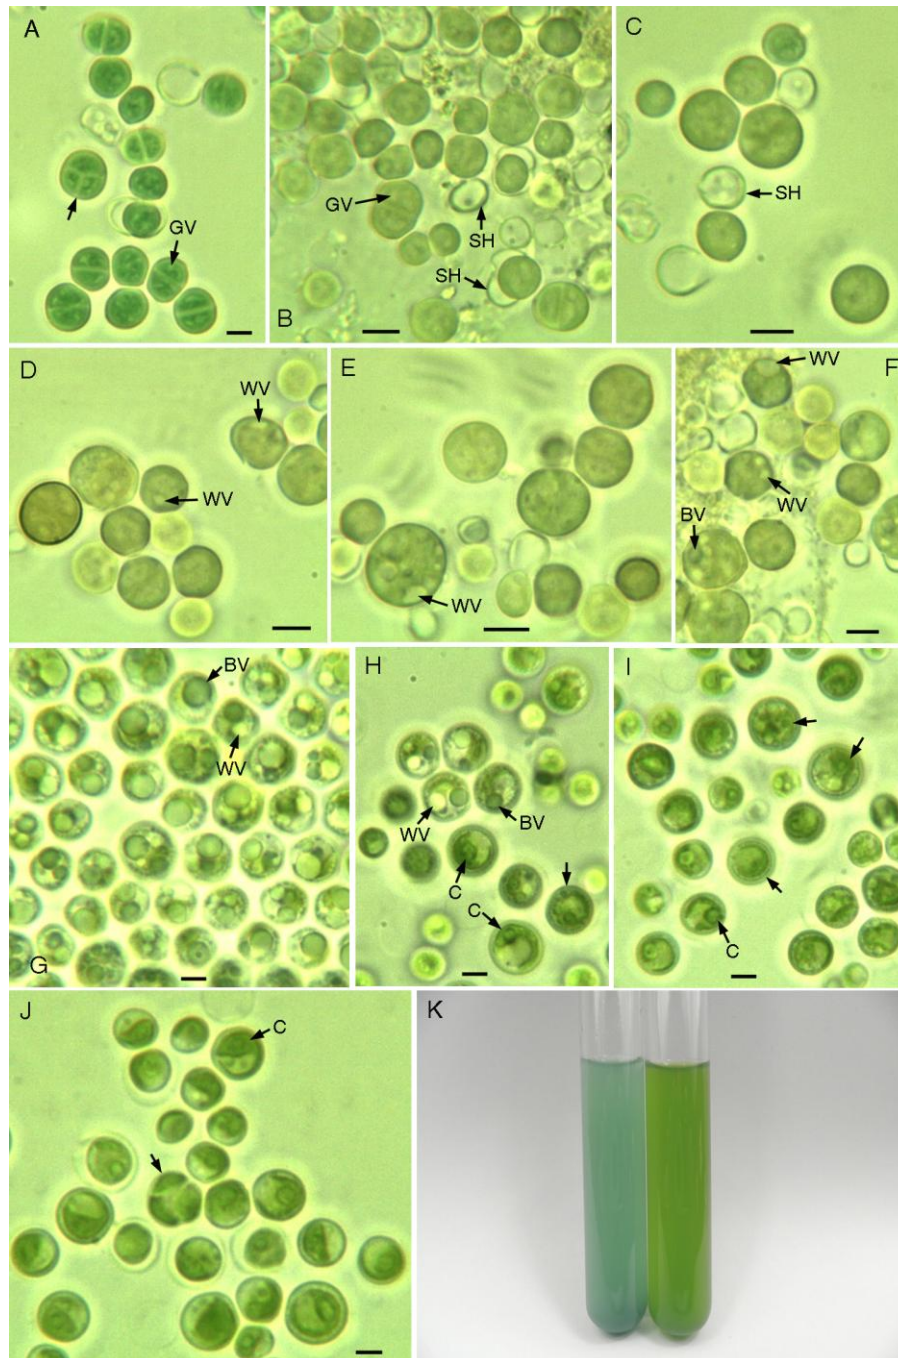

111

112 **Figure 1. Light microscopic images of cyanobacterium TDX16-to-alga transition.** (A) The newly inoculated blue TDX16 cells  
113 reproduced by binary fission within the sporangia (arrow) containing small grey vesicles (GV) (day 1). (B) TDX16 cells turned pale  
114 blue-green, some of which escaped from the sporangia leaving the remnant sheath (SH) (day 2). (C) All TDX16 cells escaped from the  
115 sporangia, increased in size, rounded up and turned a little bit more blue (day 3). (D) TDX16 cells turned slightly yellow, in which white  
116 vesicle (WV) began to form (day 4), and increased in size and number (E) (day 5). (F) TDX16 cells contained several small or one  
117 medium-sized white vesicles and occasionally a newly-formed small blue vesicles (BV) (day 6). (G) TDX16 cells turned green, in which  
118 large blue vesicles and large white vesicles formed (day 7). (H) Large blue vesicles and large white vesicles shrunk in part of TDX16 cells  
119 and vanished in the rest ones (arrow), and in some of the latter type cells parietal chloroplasts (C) developed (day 8). (I) Chloroplasts  
120 formed in most TDX16 cells, but were under development in other ones (arrow) (day 9). (J) All TDX16 cells turned into green algal cells  
121 (TDX16-DE), containing single chloroplast and reproducing by autosporulation (arrow) in day 10. (K) Image of TDX16 culture samples  
122 on day 1(left) and day 10 (right). Scale bar 2µm.

123 during the 10-day transition process other organelles aside from chloroplast and compartments also  
124 formed through previously unknown intermediates and subtle changes in ultrastructure, which can  
125 not be tracked in real time, but be detected discontinuously with the conventional transmission  
126 electron microscopy (TEM). Whereas, it is a formidable task to elucidate the complex and  
127 dynamic process of organelle biogenesis based on the static TEM images. Since TDX16 cells  
128 originally contained only heterogenous globular bodies (Fig. S2), all organelles developed from  
129 scratch. That is to say, changes of TDX16 initiated from a definite start-point and progressed  
130 irreversibly in one direction towards organelle biogenesis. In this unique situation, we sequenced  
131 TEM images according to sampling time, and reconstructed the general process of organelle  
132 biogenesis based on the connection and coherence of intermediates and changes in ultrastructure.  
133 However, the time for each change could not be determined owing to the unsynchronized states of  
134 cells, and thus time intervals were showed in the figure legends.

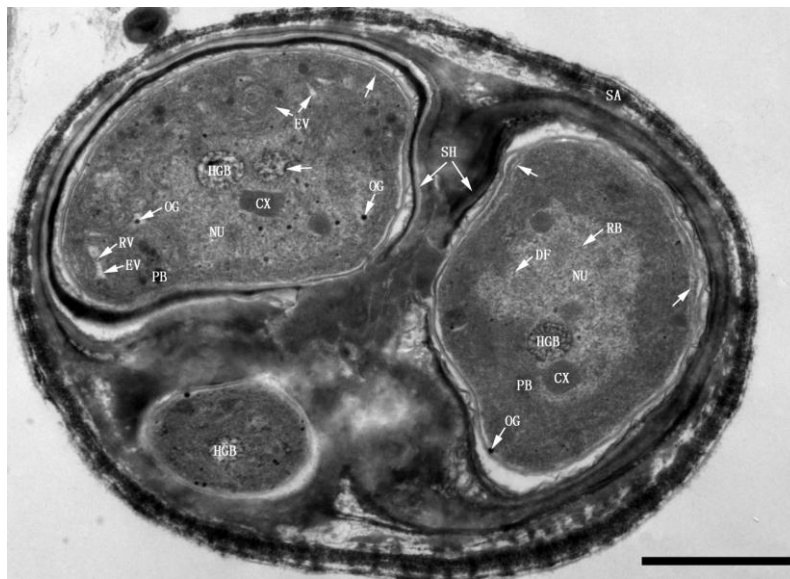

135  
136 **Figure 2. Three TDX16 cells within a sporangium (SA) (day 1).** TDX16 cells were enclosed by thick sheaths (SH), containing no  
137 thylakoid, but heterogenous globular bodies (HGB), carboxysomes (CX), ribosomes (RB), DNA fibers (DF) and osmiophilic granules  
138 (OG) in the nucleoids (NU) as well as polyphosphate bodies (PB) in the cytoplasm. OG also presented in the cytoplasm and some small  
139 electron-transparent vesicles (EV) with internal ring-shaped vesicles (RV) or OG were being developed in the upper left cell.  
140 Compartmentalization initiated in the two large cells (arrow). Scale bar, 1  $\mu$ m.

### 141 **Initial structure of TDX16 cells**

142 Initially, TDX16 cells (day 1) were surrounded by thick sheaths and enclosed within the sporangia  
143 (Fig.2-3), resembling the endospores of thermophilic cyanobacterium *Chroococcidiopsis* sp.  
144 [13-14]. TDX16 in the same or different sporangia remained at different states with some different

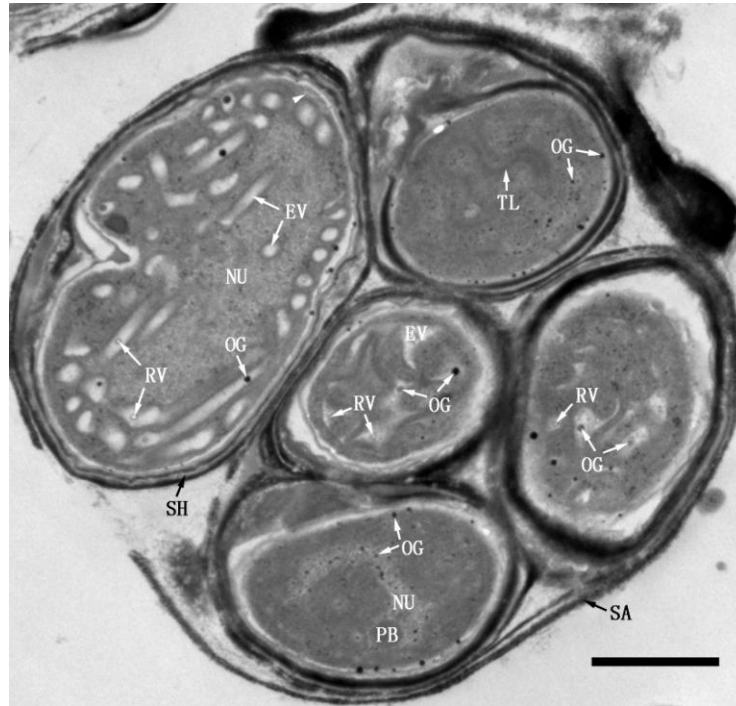

145

146 **Figure 3. Five TDX16 cells within a sporangium (SA) (day 1).** The bottom cell contained osmiophilic granules (OG), while  
147 electron-transparent vesicles (EV) were developed in the three middle cells, and several thylakoid-like structures (TL) were built up in the  
148 upper cell. Compartmentalization commenced in the large cell (arrowhead). Scale bar, 1µm.

149 inclusions (Fig.2-3). As shown in Fig.2, three different-sized cells in a multilayered sporangium  
150 contained no thylakoid but unique membrane-bounded heterogenous globular bodies (HGB) and  
151 cyanobacterial inclusions, including carboxysomes (CX) [15], polyphosphate bodies (PB) [16] and  
152 osmiophilic granules (OG) [17]. The heterogenous globular bodies sequestered DNA-like  
153 electron-dense granules and filaments (resembling compacted chromatin fibers) and situated in the  
154 nucleoids (NU), where DNA fibers (DF) [18] and ribosomes (RB) [19] scattered. The prominent  
155 difference among these cells was that some small swirly and rod-shaped electron-transparent  
156 vesicles (EV) were being developed in the left large cell. Similarly, in a five-cell-containing  
157 sporangium (Fig.3), the bottom cell contained osmiophilic granules and a polyphosphate body,  
158 while many large different-shaped electron-transparent vesicles were being developed in the three  
159 middle cells, and several thylakoid-like structures were built up in the upper cell. These results  
160 confirmed the light microscopic observations that TDX16 was hypersensitive to light and highly  
161 variable in nature, whose change could not be suppressed completely even in the dim light.

162 The electron-transparent vesicles developed from osmiophilic granules, because (1) osmiophilic  
163 granule was the only membranous cyanobacterial inclusion prior to electron-transparent vesicles,  
164 (2) osmiophilic granules presented in electron-transparent vesicles, some of which were not in the



165 section plane and thus invisible, and (3) as electron-transparent vesicles enlarged, osmiophilic  
166 granules turned into ring-shaped vesicles (RV) after their dense matrixes became opaque and  
167 finally transparent (Fig.2-3). Osmiophilic granule contains triacylglycerol and tocopherol [20],  
168 while its detail composition and structure are unknown. There is a general consensus that  
169 osmiophilic granule in cyanobacteria is comparable to plastoglobule (PG) in algal and plant  
170 chloroplasts [17, 21], which contains lipids, carotenoids, enzymes, and proteins e.g.,  
171 vesicle-inducing protein in plastids 1, and structurally consists of a monolayer lipid membrane  
172 (half unit membrane) and a neutral lipid core [22-26]. Whereas, the formation of ring-shaped  
173 vesicles in the electron-transparent vesicles indicated that osmiophilic granules had two monolayer  
174 lipid membranes: the intermembrane space was likely filled with hydrophobic neutral lipids, while  
175 the interior monolayer membrane encased probably a hydrophilic “protein core”. So, as the  
176 intermembrane space dilated, the outer monolayer membrane bulged out into an  
177 electron-transparent vesicle; while the interior monolayer membrane and protein core remained  
178 unchanged as a monolayer-membrane-bounded osmiophilic granule, which subsequently  
179 transformed into a ring-shaped vesicle after metabolizing the protein core (Fig.2-3).

## 180 **Compartmentalization, formation of cytoplasmic envelope and primary** 181 **thylakoids**

### 182 **Compartmentalization, production of osmiophilic granules, dilation of electron-transparent** 183 **vesicles and formation of cytoplasmic envelope**

#### 184 *Compartmentalization*

185 TDX16 with surrounded sheath escaped from the ruptured sporangium and changed rapidly in  
186 structures and inclusions. As shown in Fig.4A, the cyanobacterial polyphosphate bodies and  
187 carboxysomes vanished; the heterogenous globular bodies became nearly empty leaving only few  
188 DNA-like fibrils and electron-dense margin residues. While a startling number of osmiophilic  
189 granules and stacks of membranous elements emerged, and many small electron-transparent  
190 vesicles were being developed. The cell wall became clear, which, like those of gram-negative  
191 bacteria and other cyanobacteria [27-28], was composed of an electron-dense outer membrane  
192 (OM), an electron-transparent intermediate space (layer) and an inner electron-dense  
193 peptidoglycan layer (P), and separated from the cytoplasmic membrane (CM) by an  
194 electron-transparent extracytoplasmic (periplasmic) space (ES) (Fig.4A).

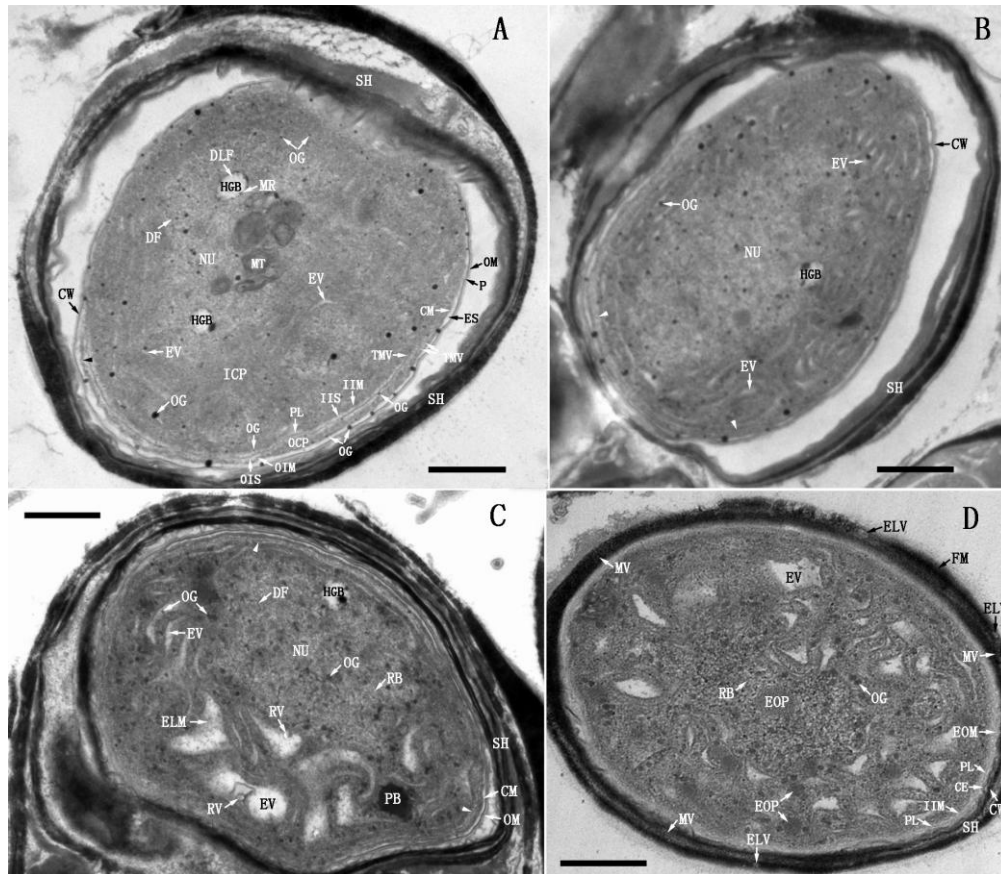

195

196 **Figure 4. Compartmentalization, formation of electron-transparent vesicles and cytoplasmic envelope (day 1-2).** (A) TDX16's cell  
197 wall (CW) comprised an outer membrane (OM) and a peptidoglycan layer (P), which was separated from the cytoplasmic membrane  
198 by an extracytoplasmic space (ES). Inside the cytoplasm, an inner intracytoplasmic membrane (IIM), an outer intracytoplasmic membrane  
199 (OIM) and an intervening peptidoglycan-like layer (PL) were being synthesized by fusion of the small thick margin vesicles (TMV)  
200 blistered form CM. Whereby, the cytoplasm was partitioned into three compartments: the inner cytoplasm (ICP); the outer cytoplasm  
201 (OCP), and the sandwiched intracytoplasmic space (IS) that was further separated by PL into an outer intracytoplasmic space (OIS) and  
202 an inner intracytoplasmic space (IIS). OCP began to reduce in localized region near the start point (arrowhead), such that OIM moved to  
203 CM. Osmiophilic granules (OG) budded from CM, IIM and OIM, and migrated into ICP, where many small electron-transparent vesicles  
204 (EV) were being formed and stacks of membranous elements (MT) emerged; while the heterogenous globular bodies (HGB) became  
205 nearly empty leaving only DNA-like fibrils (DLF) and electron-dense margin residues (MR). Interestingly, OG shed from the outer leaflet  
206 of CM into ES, connecting CM and CW. (B) IS became narrow (arrow), while more and more small EV were being developed (C) EV  
207 dilated into swirling ones spiraling around the nucleoids (NU). (D) OCP vanished, OIM and CM were positioned together giving rise to a  
208 double-membraned cytoplasmic envelope (CE); NU and HGB disappeared, several electron-opaque particles (EOP) emerged; IS became  
209 widened filling with electron-opaque materials (EOM); a new sheath (SH) was formed, consisting of flocculent fibrillary materials (FM),  
210 microvesicles (MV) and electron-translucent vesicles (ELV). Scale bar, 0.5  $\mu\text{m}$ .

211 The most striking change was the compartmentalization of prokaryotic cytoplasm (cytoplasm)  
212 (Fig.4A): two intracytoplasmic membranes and an intervening peptidoglycan-like layer (PL) were  
213 being synthesized synchronously, which initiated from a start point and extended parallel to the  
214 cytoplasmic membrane. As a result, the cytoplasm was partitioned into three compartments: (1)  
215 the inner cytoplasm (ICP) delimited by the inner intracytoplasmic membrane (IIM), (2) the outer

216 cytoplasm (OCP) bounded by the outer intracytoplasmic membrane (OIM) and cytoplasmic  
217 membrane, and (3) the sandwiched intracytoplasmic space (IS) that was further separated by the  
218 peptidoglycan-like layer into an outer intracytoplasmic space (OIS) and an inner intracytoplasmic  
219 space (IIS) (Fig.4A). It was important that the outer cytoplasm began to degrade in localized  
220 regions near the start point, such that the outer intracytoplasmic membrane got closed to the  
221 cytoplasmic membrane (Fig.4A). In fact, compartmentalization also commenced in some of the  
222 newly inoculated cells (day 1, Fig.2-3). The intracytoplasmic membranes and peptidoglycan-like  
223 layer were synthesized by fusion of the small thick margin vesicles (TMV) blistered from the  
224 inner leaflet of the cytoplasmic membrane (Fig.4A) in two probable ways: (1) if the small thick  
225 margin vesicles were delimited by a half-unit membrane, they first released their contents for  
226 synthesizing the septal peptidoglycan-like layer and then fused alternately on its two sides; (2) if  
227 the small thick margin vesicles were limited by a unit membrane, as they fused one another, the  
228 septal peptidoglycan-like layer was synthesized within the coalesced vesicles, a scenario  
229 somewhat similar to the formation of cell plate during cytokinesis [29].

### 230 ***Production of osmiophilic granules***

231 Osmiophilic granules of various sizes blistered from the inner and outer leaflets of the cytoplasmic  
232 membrane (Fig.4A), such a scenario was also observed in the newly inoculated cells (Fig.2-3).  
233 Importantly, some small osmiophilic granules also budded from the intracytoplasmic membranes  
234 (Fig. 4A). These results suggested that the intracytoplasmic membranes were functionally  
235 comparable to the cytoplasmic membrane that was apparently capable of both photosynthesis and  
236 respiration just like the cytoplasmic membrane of the thylakoid-less cyanobacterium *Gloeobacter*  
237 *violaceus* [30-31]. Osmiophilic granules appeared to play different roles: these blistered from the  
238 inner leaflet of cytoplasmic membrane and the intracytoplasmic membranes migrated into the  
239 inner cytoplasm for developing electron-transparent vesicles (Fig.4A); while those shed off the  
240 outer leaflet of cytoplasmic membrane contacted the cell wall, and thus served likely as transport  
241 conduits or transport vesicles to channel or transfer lipids and carotenoids from cytoplasmic  
242 membrane to cell wall (Fig.4A), because these compounds were synthesized on cytoplasmic  
243 membrane but deposited in outer membrane [32].

### 244 ***Dilation of electron-transparent vesicles and formation of cytoplasmic envelope***

245 As the intracytoplasmic membranes and peptidoglycan-like layer extended progressively (Fig.4B)

246 and closed up (Fig.4C), the small electron-transparent vesicles elongated (Fig.4B) and dilated  
247 asymmetrically into swirling ones spiraling around the nucleoid (Fig.4C). Thereafter, the outer  
248 cytoplasm vanished and thus the outer intracytoplasmic membrane and cytoplasmic membrane  
249 combined into a double-membraned cytoplasmic envelope (CE), which abutted the cell wall  
250 owing to the narrowing of extracytoplasmic space (Fig.4D). In parallel with these changes: (1) the  
251 heterogenous globular body and nucleoid disappeared, while electron-opaque particles (EOP)  
252 formed (Fig. 4D); (2) the intracytoplasmic space widened, filling with electron-opaque materials  
253 (EOM) (Fig. 4D); and (3) the old thick sheath scaled off, while a new fuzzy loosely compacted  
254 sheath external to the outer membrane formed, comprising of fibrillar materials (FM),  
255 microvesicles (MV) and electron-translucent vesicles (ELV).

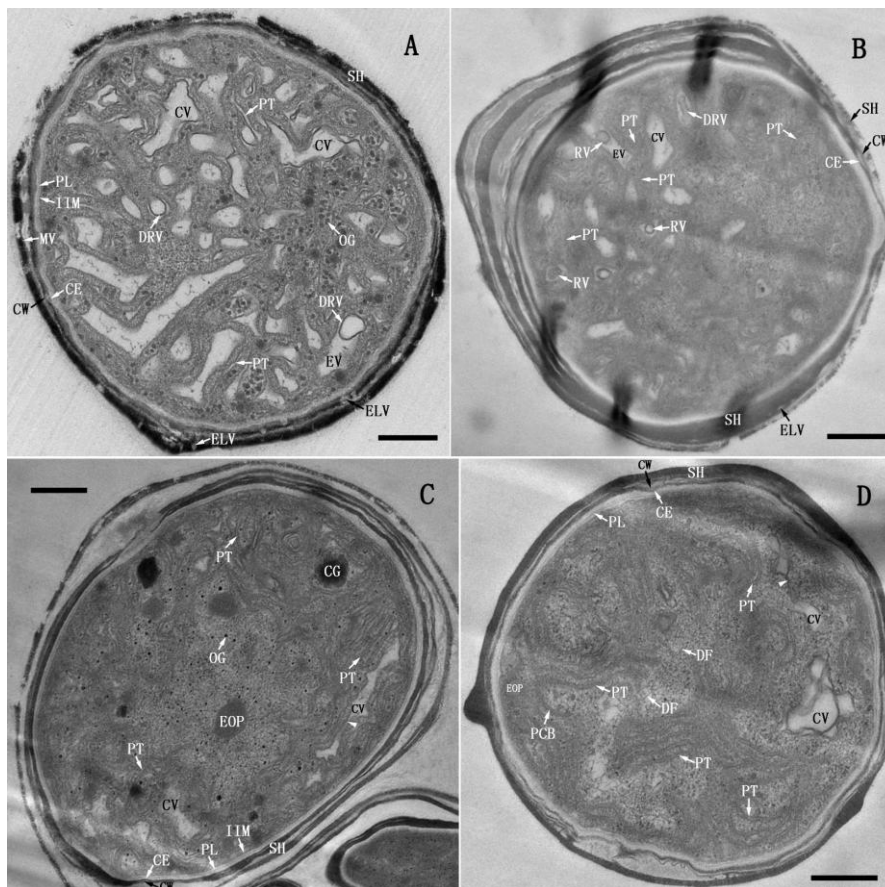

256

257 **Figure 5. Formation of primary thylakoid (day 2-3).** (A) Ring-shaped vesicles (RV) swelled up into dilated-ring-shaped vesicles  
258 (DRV), whose membranes met with the membranes of electron-transparent vesicles (EV), and thus gave rise to  
259 unit-membrane-bounded combined vesicles (CV). Subsequently, CV coalesced into longer ones or flattened out into slender short  
260 primary thylakoids (PT). (B) The newly formed short PT distributed randomly in the inner cytoplasm (ICP), whose matrix turned  
261 opaque. Occasionally a cluster of small RV presented in a EV. (C) The short PT extended or merged end-to-end into long PT; while the  
262 long CV flattened out into PT by localized-constriction (arrowhead). Meanwhile, several cyanophycin granules (CG) were formed. (D)  
263 The extrinsic phycobilisomes (PCB) were assembled on PT. Scale bar, 0.5  $\mu$ m.

264 **Formation of primary thylakoids**

265 As shown in Fig.5A, the intraluminal ring-shaped vesicles swelled up into dilated-ring-shaped  
266 vesicles (DRV), whose membranes ultimately met and combined with the electron-transparent  
267 vesicle membranes, giving rise to unit-membrane-bounded combined vesicles (CV); and then the  
268 combined vesicles coalesced into long ones or flattened out into short slender sacs, which were  
269 morphologically similar to cyanobacterial thylakoids, termed primary thylakoids (PT). In this way,  
270 the electron-transparent vesicles developed progressively into short primary thylakoids with  
271 opaque luminal matrix, distributing randomly in the inner cytoplasm (Fig.5B). After that, the short  
272 primary thylakoids extended or merged end-to-end into longer ones with concurrent formation of  
273 cyanophycin granules (CG) [33] and electron-opaque particles; while the long combined vesicle  
274 flattened out into primary thylakoids stepwise by localized-constriction (Fig. 5C). Finally,  
275 extrinsic phycobilisomes (PCB) [34] were assembled on the irregular-arranged primary thylakoids  
276 (Fig.5D). So as a result, the inner cytoplasm with primary thylakoids looked like the  
277 cyanobacterial cytoplasm, but contained no cyanobacterial inclusions.

278 **De-compartmentalization, disassembly of primary thylakoids, DNA partition,**  
279 **re-compartmentalization and formation of secondary thylakoids**

280 **De-condensation and de-compartmentalization of inner cytoplasm, disassembly of primary**  
281 **thylakoids and DNA migration**

282 As shown in Fig.6A, the inner cytoplasm de-condensed (solubilized) and became translucent with  
283 concomitant formation of less electron-dense materials (LDM), less electron-dense bodies (LDB)  
284 and cyanophycin granules; while the luminal matrix of primary thylakoids condensed, and so the  
285 membrane pair was in close apposition, seeming to be a single unit membrane with rough margin,  
286 between which short DNA fibers dispersed. In the meantime, the inner intracytoplasmic  
287 membrane disassembled into tiny vesicles (TV), such that the solubilized inner cytoplasm was  
288 de-compartmentalized and coalesced with the inner intracytoplasmic space; the less electron-dense  
289 materials diffused outward, blurring the compacted peptidoglycan-like layer, cytoplasmic  
290 envelope and cell wall (Fig. 6A). Subsequently, the coalesced inner cytoplasm and inner  
291 intracytoplasmic space was separated into lower and upper portions by the less electron-dense  
292 materials: in the lower portion, the primary thylakoids broke up into double-layered membrane

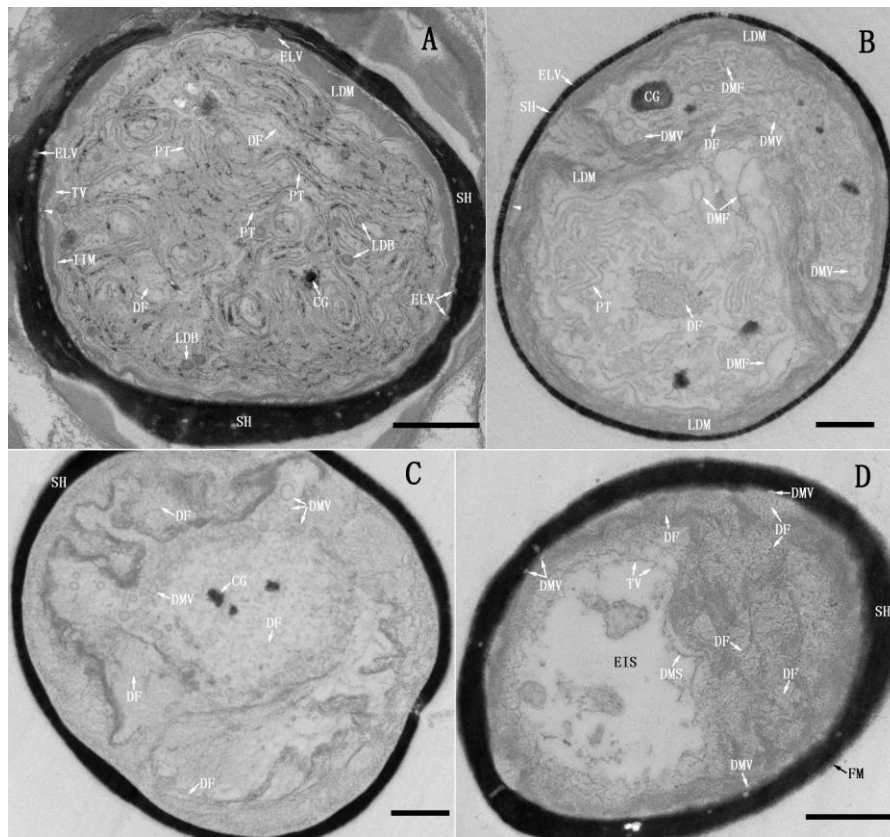

293

294 **Figure 6. De-condensation and de-compartmentalization of inner cytoplasm, disassembly of primary thylakoids and DNA**  
295 **migration (day 4-5).** (A) The inner cytoplasm (ICP) decondensed and became translucent, with concomitant production of less  
296 electron-dense materials (LDM), less electron-dense bodies (LDB) and cyanophycin granules (CG). The luminal matrix of primary  
297 thylakoids (PT) condensed and thus the membrane pair were in close apposition, between which short DNA fibers (DF) dispersed. The  
298 inner intracytoplasmic membrane (IIM) disassembled into tiny vesicles (TV), thus, the inner cytoplasm and inner intracytoplasmic space  
299 coalesced; LDM diffused outward blurring the compacted peptidoglycan-like layer (PL), cytoplasmic envelope (CE) and cell wall (CW)  
300 (arrowhead). (B) The primary thylakoids broke up into double-layered membrane fragments (DMF), which merged laterally into  
301 double-membraned vesicles (DMV); while DF aggregated into a cluster. (C) DMV and DF dispersed in the coalesced ICP and inner  
302 intracytoplasmic space (D) DMV moved outward quickly and attached to PL that was cover by electron-dense materials, while the  
303 tangled DF migrated slowly resulting in an “empty” inner space (EIS), at the border of which the recruited TV began to fuse and elongate  
304 into double-layered membrane segments (DMS). Scale bar, 0.5  $\mu\text{m}$ .

305 fragments (DMF, two unit membranes) and thus DNA fibers aggregated; while in the upper  
306 portion, the double-layered membrane fragments began to curl and merge laterally into  
307 double-membraned vesicles (DMV) (Fig. 6B). As such, all double-layered membrane fragments  
308 were assembled into double-membraned vesicles, which dispersed along with DNA fibers in the  
309 coalesced inner cytoplasm and inner intracytoplasmic space (Fig. 6C). Thereafter, the  
310 double-membraned vesicles moved outward quickly and attached to the peptidoglycan-like layer  
311 that was cover by electron-dense materials, while the tangled DNA fibers migrated slowly  
312 resulting in an “empty” inner space (EIS), at the border of which the recruited tiny vesicles began  
313 to fuse and elongate into double-layered membrane segments (DMS) (Fig. 6D).

314 **Re-compartmentalization, DNA partition and formation of secondary thylakoids**

315 As the double-layered membrane segments extended into the double-membraned intracytoplasmic  
316 envelope (ICE), the coalesced inner cytoplasm and inner intracytoplasmic space was  
317 re-compartmentalized into a new inner cytoplasm (NIC) and a new inner intracytoplasmic space  
318 (NIS) (Fig.7A). The new inner cytoplasm was enclosed by the intracytoplasmic envelope; while  
319 the new inner intracytoplasmic space represented the space between the intracytoplasmic envelope  
320 and peptidoglycan-like layer. Most DNA fibers were allocated into the new inner intracytoplasmic  
321 space, which de-condensed into cloudlike materials (CLM) or aggregated into thick DNA threads  
322 (DT); by contrast only few sporadic DNA fibers and electron-dense particles (EP) were partitioned  
323 into the new inner cytoplasm (Fig.7A). The intracytoplasmic envelope was not sealed, on the outer  
324 leaflet of which, some electron-transparent materials were synthesized, similar in appearance to  
325 the bacterial lipid [35]. Hereafter, accompanying the expansion of intracytoplasmic envelope,  
326 DNA fibers in the narrowing new inner intracytoplasmic space decondensed and likely attached to  
327 the thickened peptidoglycan-like layer (Fig.7B); while the double-membraned vesicles that were  
328 covered by less electron-dense materials detached from the peptidoglycan-like layer, moving  
329 inward via the opening of intracytoplasmic envelope into the new inner cytoplasm and outward  
330 through the pores on the peptidoglycan-like layer into the outer intracytoplasmic space (Fig.7B).  
331 Hence, the fenestrated peptidoglycan-like layer served not only as a mechanical and osmotic  
332 barrier, but also a platform for anchoring DNA and double-membraned vesicles. When the  
333 intracytoplasmic envelope closed up, DNA in the new inner intracytoplasmic space was assembled  
334 into thick DNA fibers resembling chromatin fibers [36] with concomitant formation of countless  
335 ribosomes (Fig. 7C). Simultaneously, in the new inner cytoplasm an increased number of DNA  
336 fibers and many ribosomes were synthesized; the double-membraned vesicles dilated, opened up  
337 and became double-layered membrane fragments (Fig. 7C). After that, the double-layered  
338 membrane fragments extended randomly into spiral thylakoids, which were devoid of  
339 phycobilisomes and morphologically different from the primary thylakoids, termed secondary  
340 thylakoids (ST) (Fig.7D). Concomitant with development of secondary thylakoids was the  
341 formation of osmiophilic granules and electron-opaque bodies as well as enrichment of DNA  
342 fibers and ribosomes in the expanded new inner cytoplasm (Fig.7D). The structures outside of the  
343 new inner cytoplasm were fuzzy owing to diffusion of electron-dense materials. The major portion

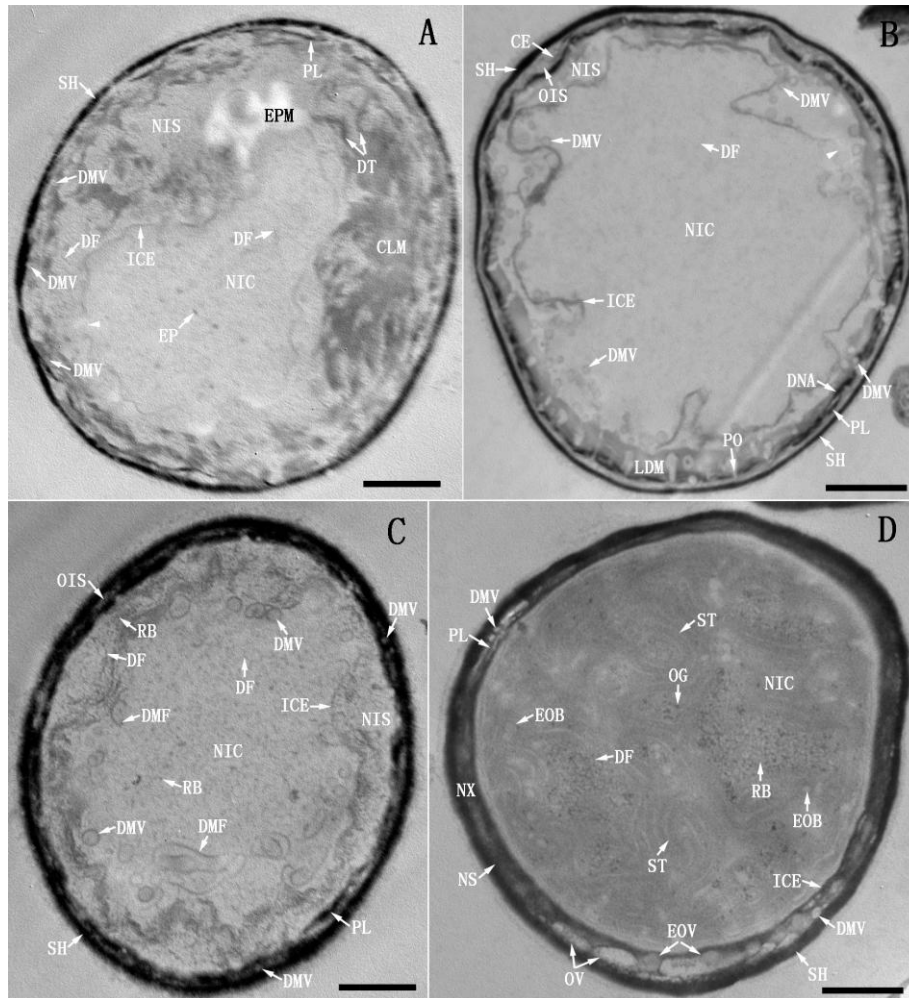

344

345 **Figure 7. Re-compartmentalization, DNA partition and formation of secondary thylakoids. (day 5-6)** (A) The double-membraned  
346 intracytoplasmic envelope (ICE) re-compartmentalized the coalesced inner cytoplasm and inner intracytoplasmic space into a new inner  
347 cytoplasm (NIC) and a new inner intracytoplasmic space (NIS). Most of the DNA fibers (DF) were allocated into NIS, which  
348 dec condensed into cloudlike materials (CLM) or aggregated into DNA threads (DT), while only few DF and electron-dense particles (EP)  
349 were partitioned into NIC. ICE had an opening (arrowhead), on the outer leaflet of which, some electron-transparent materials (EPM)  
350 were synthesized. (B) The double-membraned vesicles (DMV) in NIS moved into NIC via ICE opening (arrowhead), or passed through  
351 the pores (PO) on the peptidoglycan-like layer (PL) into outer intracytoplasmic space (OIS). (C) ICE sealed, DNA in NIS condensed into  
352 a mass of DF with concomitant formation of countless ribosomes (RB); while an increased number of DF and RB were formed in NIC;  
353 DMV opened up into double-layered membrane fragments (DMF) and elongated. (D) DMF in NIC extended into secondary thylakoids  
354 (ST) with concomitant formation of osmiophilic granules (OG) and electron-opaque bodies (EOB) as well as enrichment of DF and RB.  
355 Outside of NIC, the major portion of PL was dismantled, such that NIS and OIS coalesced into a new intracytoplasmic space (NS),  
356 sequestering new intracytoplasmic matrix (NX), DMV, oblong vesicles (OV) and electron-opaque vesicles (EOV). Scale bar, 0.5  $\mu$ m.

357 of peptidoglycan-like layer was dismantled, and thus the new inner intracytoplasmic space and  
358 outer intracytoplasmic space coalesced into a new intracytoplasmic space (NS), whose content  
359 was termed intracytoplasmic matrix (NX). There were different vesicles in the new  
360 intracytoplasmic space, including double-membraned vesicles as well as newly formed  
361 electron-translucent oblong vesicles (OV) and electron-opaque vesicles (EOV) (Fig.7D).



362 The viability of TDX16 manifested the coordination and competence of the only two  
363 compartments in performing cellular functions. The new inner cytoplasm performed  
364 photosynthesis and respiration on the secondary thylakoids just like the cases of cyanobacteria,  
365 though it contained only a handful of DNA and no cyanobacterial inclusion except osmiophilic  
366 granules; while the new intracytoplasmic matrix retained the major fraction of cellular DNA and  
367 performed most if not all of other metabolic activities.

## 368 **Biogenesis of primitive chloroplast, eukaryotic cell wall and primitive nucleus**

### 369 **Biogenesis of primitive chloroplast and eukaryotic cell wall**

370 As shown in Fig.8A, the new inner cytoplasm became polarized, in which the newly formed  
371 secondary thylakoids underwent disassembly, leaving some remnants in the lower region; while  
372 parallel arrays of discrete slender sacs with transparent matrix were being developed in the upper  
373 region. These parallel-arranged slender sacs were morphologically similar to algal and plant  
374 thylakoids, termed primitive eukaryotic thylakoids (PMT), which appeared to develop from the  
375 plastoglobuli (similar in appearance to but smaller in size than osmiophilic granules) formed  
376 during disassembly of secondary thylakoids (Fig.8A), in a way similar to development of primary  
377 thylakoids from osmiophilic granules (Fig.5). Beneath the primitive eukaryotic thylakoids, a  
378 nascent pyrenoid (PD) with an incomplete starch plate (SP) and two starch granules (SG) were  
379 formed (Fig. 8A), both of which were the characteristic bodies of green algal chloroplasts [37].  
380 Accordingly, the new inner cytoplasm developed into a primitive chloroplast (PC) delimited by  
381 the double-membraned intracytoplasmic envelope. That was to say, the intracytoplasmic envelope  
382 became the double-membraned chloroplast envelope (CHE). The absence of mitochondrion  
383 suggested that respiration took place on the primitive eukaryotic thylakoids. Thus, the primitive  
384 chloroplast was a dual-function composite organelle.

385 The new intracytoplasmic space became clear: the new intracytoplasmic matrix condensed,  
386 containing ribosomes and chromatin fibers (CF) [36, 38]; the peptidoglycan-like layer and  
387 double-membraned vesicles disappeared, while many small dotted vesicles (DV) blistered from  
388 the chloroplast envelope and lined up along the cytoplasmic envelope, some of which began to  
389 fuse and flattened out into membrane segments (MS) (Fig.8A). Such a scenario of membrane  
390 synthesis was akin to nuclear envelope assembly [39-40]. In addition, a large coated-vesicle-like

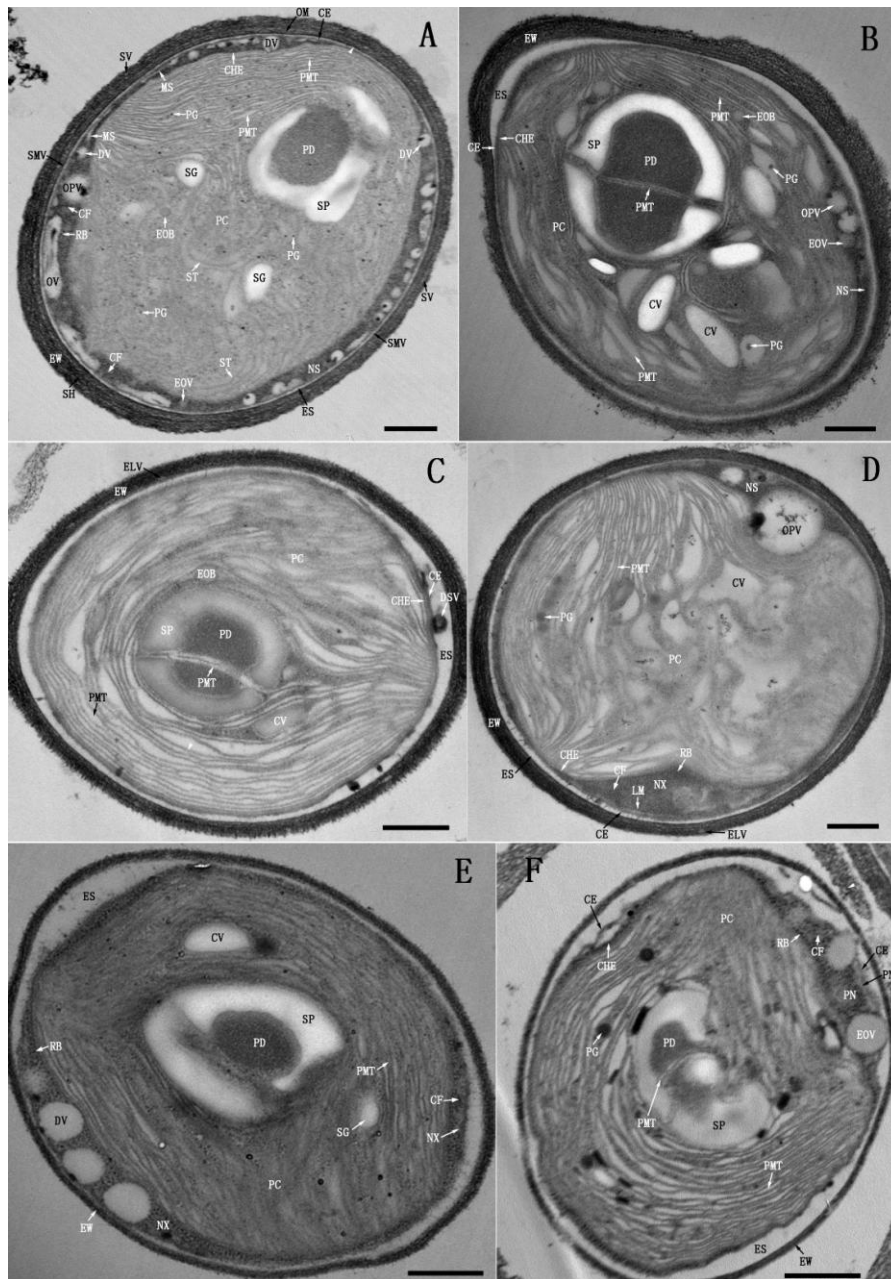

391

392 **Figure 8. Biogenesis of primitive chloroplast, eukaryotic cell wall and primitive nucleus (day-7-9).** (A) The secondary thylakoids (ST)  
 393 were dismantled leaving some remnants and plastoglobuli (PG) in the lower region of new inner cytoplasm (NIC), while parallel arrays of  
 394 primitive eukaryotic thylakoids (PMT) were being developed in the upper region of NIC with concomitant formation of a nascent  
 395 pyrenoid (PD) with an incomplete starch plate (SP), and two starch granules (SG). So, NIC developed into the primitive chloroplast (PC),  
 396 and the intracytoplasmic envelope became the chloroplast envelope (CHE). Inside the new intracytoplasmic space (NS), thick chromatin  
 397 fibers (CF) and large ribosomes (RB) were formed; the peptidoglycan-like layer and the double-membraned vesicles disappeared; while  
 398 many small dotted vesicles (DV) and opaque-periphery vesicle (OPV) emerged. Some DV began to fuse and flattened into membrane  
 399 segments (MS). Outside of the new intracytoplasmic space (NS), some smaller vesicles (SMV) shed from the cytoplasmic envelope (CE)  
 400 into the extracytoplasmic space (ES); the peptidoglycan layer (P) turned into an electron-dense layer (EL) (arrowhead), and a stratified  
 401 SH embedded with small vesicles (SV) was formed external to the outer membrane (OM). Hence OM, EL and the sandwiched  
 402 electron-transparent space constituted a trilaminar domain, which along with SH became the eukaryotic cell wall (EW). (B) PMT with  
 403 wide luminal space were formed continuously by elongation of the combined vesicle (CV); PD was surrounded with a complete SP and  
 404 bisected by two pairs of PMT; hence PC expanded and occupied most NS in the longitudinally sectioned plane; (C) PC filling with PMT

405 occupied whole NS in longitudinally sectioned plane; CHE adhered to CE and a dense vesicle (DSV) shed off from CE into the widened  
406 ES. (D) The vertical section of a cell. The anterior portion of PC contacted CE; MS merged into the limiting membrane (LM) at the  
407 border of new intracytoplasmic matrix (NX) (E) The oblique section of a cell. The major fraction of NX converged at one side of PC. (F)  
408 The tangential section of a cell. NX was encased by LM into the primitive nucleus (PN) containing CF, RB and electron-opaque vesicles  
409 (EOV); while LM became primitive nuclear envelope (PNE). NS vanished, and so CE shrank and wrapped PC and PN. Scale bar, 0.5  $\mu$ m.  
410 opaque-periphery vesicle (OPV) was being assembled at the primitive chloroplast envelope, which  
411 bridge the primitive chloroplast and cytoplasmic envelope probably for transferring substances.

412 The fuzzy electron-dense sheath external to the cell wall (Fig.7D) scaled off, while a  
413 stratified sheath embedded with many small vesicles formed, which adhered to the outer  
414 membrane and made the latter difficult to discern (Fig.8A); the peptidoglycan layer (Fig. 4A)  
415 became denser and thicker indicating changes of its composition and thus was referred to as  
416 electron-dense layer (EL). In this case, the outer membrane along with the electron-dense layer  
417 and the sandwiched electron-transparent space still adopted its original configuration (Fig. 4A),  
418 and thus constituted a trilaminar domain resembling the trilaminar sheath in the cell walls of green  
419 algae [41-45], which combined with the stratified sheath into a continuum similar in structure to  
420 the cell walls of green algae, termed eukaryotic cell wall (EW).

#### 421 **Biogenesis of primitive nucleus**

422 As plastoglobuli developed progressively into combined vesicles and then flattened into primitive  
423 eukaryotic thylakoids with wide luminal space in the lower region of primitive chloroplast, the  
424 pyrenoid got matured, which was surrounded with a complete starch plate and bisected by two  
425 pairs of primitive eukaryotic thylakoids. Hence, the primitive chloroplast expanded substantially  
426 with corresponding shrinkage of the new intracytoplasmic space (Fig. 8B). Subsequently, the  
427 primitive eukaryotic thylakoids coalesced and extended around the pyrenoid, the adjacent  
428 membranes of which were connected, seeming to be a single membrane (Fig. 8C); the further  
429 expanded primitive chloroplast occupied whole new intracytoplasmic space in the longitudinally  
430 sectioned planes, and so the primitive chloroplast envelope fully adhered to the cytoplasmic  
431 envelope, from the latter of which a dense vesicle (DSV) shed off into the widened  
432 extracytoplasmic space (Fig.8C). Consistently, vertical profile (Fig.8D) showed that the anterior  
433 portion of new intracytoplasmic space disappeared owing to expansion of primitive chloroplast, as  
434 such the new intracytoplasmic matrix in the shrunken new intracytoplasmic space was  
435 concentrated by squeezing out liquid into the extracytoplasmic space, at the border of which the

436 membrane segments coalesced into a limiting membrane (LM) (Fig.8D). As the expansion of  
437 primitive chloroplast continued, the stepwise-concentrated new intracytoplasmic matrix moved to  
438 (Fig. 8E) and finally converged at one side of primitive chloroplast, which was ensheathed by the  
439 limiting membrane into a membrane-bounded organelle adhering to the primitive chloroplast (Fig.  
440 8F). This organelle sequestered the new intracytoplasmic matrix that retained the major fraction of  
441 cellular DNA and performed metabolic activities, and thus was also a composite organelle, termed  
442 primitive nucleus (PN). As such, the limiting membrane became the primitive nucleus envelope  
443 (PNE) that probably consisted of four unit membranes, because it was synthesized by fusion of the  
444 small dotted vesicles that were budded from the primitive chloroplast envelope (Fig. 8A) and  
445 likely delimited by two unit membranes. Concurrent with the formation of primitive nucleus, the  
446 new intracytoplasmic space vanished, and thus the cytoplasmic envelope shrank and wrapped the  
447 only two primitive organelles, apparently to keep intercommunication via intimate membrane  
448 contacts in this vital transient state (Fig. 8F).

#### 449 **Formation of eukaryotic cytoplasmic matrix and biogenesis of mitochondria**

#### 450 **Concurrent formation of eukaryotic cytoplasmic matrix and biogenesis of mitochondria**

451 As shown in Fig.9A, a vesicle-containing body (VB), apparently chipped off the invaginated  
452 primitive chloroplast, was being engulfed by the primitive nucleus with concomitant formation of  
453 a thin layer of electron-dense materials; and concurrently a small nascent mitochondrion (M) was  
454 being assembled within the primitive chloroplast. The primitive nucleus envelope was contiguous  
455 with the cytoplasmic envelope at the outer side, but separated into two sets of double-membraned  
456 envelopes inside the primitive chloroplast cavity, the inner and outer sets of which were referred to  
457 as nuclear envelope (NE) and outer nuclear envelope (OE) respectively. This result confirmed that  
458 the primitive nucleus envelope consisted of four unit membranes. The thin layer of electron-dense  
459 materials was a ribosome-containing fluid extruded from the primitive nucleus at the site where  
460 the nuclear envelope and outer nuclear envelope fused, which served as the medium connecting  
461 the primitive organelles and cytoplasmic envelope, and thus was the incipient eukaryotic  
462 cytoplasmic matrix (cytosol) (EM). After 'digestion' of the vesicle-containing body, the primitive  
463 nucleus and eukaryotic cytoplasmic matrix both increased in sizes; while an oval mitochondrion

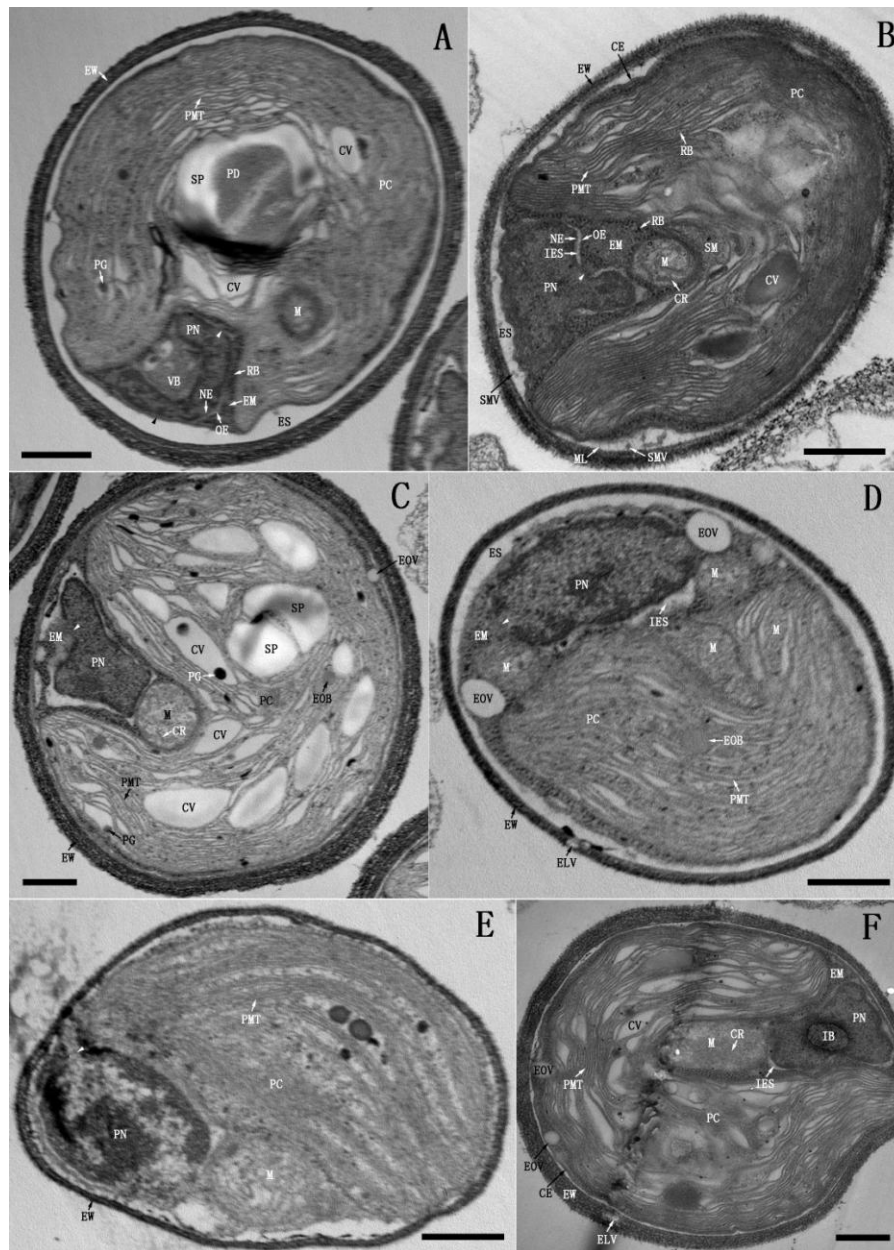

464

465 **Figure 9. Concurrent formation of eukaryotic cytoplasmic matrix and biogenesis of mitochondria (day 8-9).** (A) The primitive  
 466 nucleus (PN) engulfed a vesicle-containing body (VB) and extruded nuclear matrix (white arrowhead) to build up the eukaryotic  
 467 cytoplasmic matrix (EM); while a mitochondrion (M) was assembled in the primitive chloroplast (PC). The nuclear envelope (NE) and  
 468 outer nuclear envelope (OE) were separated in PC cavity but contiguous with the cytoplasmic envelope (CE) at the outer side (black  
 469 arrowhead). (B) PC with enriched stroma (SM) further invaginated, in the apical dome of its cavity, a mitochondrion with characteristic  
 470 cristae (CR) emerged. OE and NE were separated by an inter envelope space (IES), but fused at one site into a large opening (arrowhead),  
 471 from which the nuclear matrix was extruded. A number of smaller vesicles (SMV) and microfibrils (ML) budded and emanated  
 472 respectively from CE into the extracytoplasmic space (ES). (C), (D) and (E) PN extruded nuclear matrix (arrowhead). (F) PN contained a  
 473 membrane-delimited intranuclear body (IB). Scale bar, 0.5  $\mu$ m.

474 with characteristic cristae (CR) emerged in the apical dome of the enlarged primitive chloroplast  
 475 cavity (Fig.9B). The nuclear envelope and outer nuclear envelope were separated by an  
 476 interenvelope space (IES), but merged at one site resulting in a wide opening, from which the

477 primitive nuclear matrix was extruded. Ribosomes in the eukaryotic cytoplasmic matrix were  
478 larger than those within the primitive chloroplast stroma (SM), most of which were bound to the  
479 outer membranes of primitive organelles (Fig. 9B). During this process, a number of smaller  
480 vesicles and microfibrils (ML) budded and emanated from cytoplasmic envelope into  
481 extracytoplasmic space, respectively (Fig. 9B). Concurrent extrusion of primitive nuclear matrix  
482 and formation of mitochondrion in different cells took place in the same manner (Fig. 9C, D and  
483 E), and in one of which two spindle-shaped mitochondria were just being assembled within the  
484 primitive chloroplast (Fig. 9D). Occasionally, an unusual membrane-delimited intranuclear body  
485 (IB) appeared in the primitive nucleus (Fig. 9F), which seemed to be developed during engulfment  
486 and digestion of the vesicle-containing body or the like and play a role in selective extrusion of the  
487 primitive nuclear matrix to build up the eukaryotic cytoplasmic matrix.

#### 488 **Continuous biogenesis of mitochondria after formation of eukaryotic cytoplasmic matrix**

489 After building up sufficient eukaryotic cytoplasmic matrix, bulk extrusion of primitive nuclear  
490 matrix ceased. So the primitive nucleus got matured into a nucleus (N) and TDX16 developed into  
491 a premature eukaryote, because new mitochondria were continuously developed in the primitive  
492 chloroplast even after the formation of vacuole (V) with internal vesicle (IV), multilamellar body  
493 (MLB), lipid droplet (LD), and small opaque vesicle (SOV), leading to distortion of the primitive  
494 eukaryotic thylakoids and diminishment of the primitive chloroplast (Fig.10). As shown in  
495 Fig.10A, a small mitochondrion was being developed in the periphery of the primitive chloroplast;  
496 while a twisting dumbbell-shaped mitochondrion in another cell was nearly finished, one of its  
497 bulbous-end sequestering an internal body (ITB) was segregated, but another end still under  
498 development in the primitive chloroplast (Fig.10B). Details of mitochondrion biogenesis were  
499 detected during assembly of giant mitochondria. As shown in Fig. 10C, a giant 'L-shaped'  
500 mitochondrion was in development and still continuous with the primitive chloroplast in the  
501 region around its corner point: the inner side envelope of its long arm and the corresponding  
502 portion of chloroplast envelope, as well as the interior cristae were nearly complete; while those of  
503 its short arm were just being synthesized. All these membranes were synthesized by merging the  
504 small dense-margined vesicles (DGV) developed from the segmented primitive eukaryotic  
505 thylakoids (Fig. 10C). Similarly, in another cell a bulky mitochondrion was undergoing  
506 segregation, which was connected with the primitive chloroplast on the inner side but a small

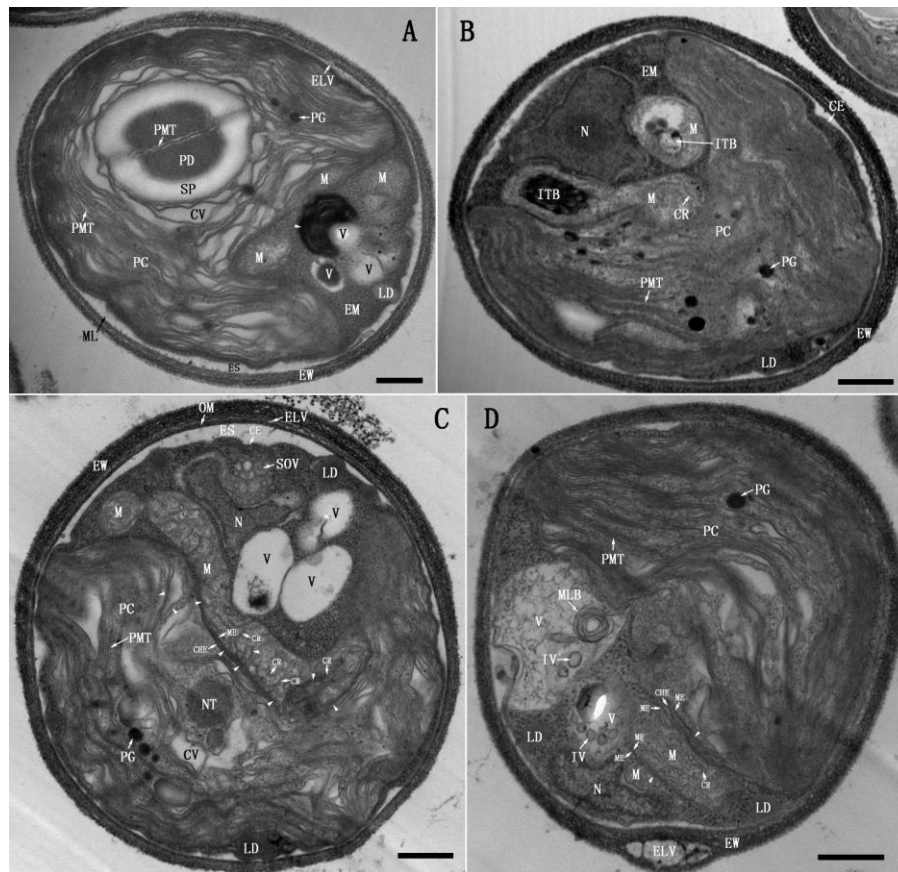

507

508 **Figure 10. Biogenesis of mitochondria after building up eukaryotic cytoplasmic matrix (day 8-9).** (A) A small mitochondrion was  
509 being developed in the primitive chloroplast (PC) in the presence of two mitochondria, three vacuoles (V), a lipid droplet (LD) and some  
510 electron-dense materials (arrowhead). (B) A twisting dumbbell-shaped mitochondrion was nearly finished, one of its bulbous-end  
511 sequestering an internal body (ITB) was segregated, but the other end was contiguous with PC (C) A large 'L-shaped' mitochondrion was  
512 being assembled in the presence of three vacuoles and a cluster of small opaque vesicles (SOV), which was continuous with PC in the  
513 region around its corner point. The inner side mitochondrial envelope (ME) and the corresponding portion of chloroplast envelope (CHE)  
514 as well as cristae (CR) were being synthesized by fusion of the dense-margined vesicles (DGV) (arrowhead) that were developed by  
515 segmentation of the primitive eukaryotic thylakoids (PMT). There was a large nucleoid-like structure (NT) in the venter side of PC. (D)  
516 After emergence of the large vacuole with internal vesicles (IV) and a multilamellar body (MLB), a bulky mitochondrion was being  
517 developed, which was connected with PC on the inner side but a small mitochondrion on the outer side. In the inner and outer interfaces,  
518 three and two pairs of contorted membranes were being synthesized respectively by merging DGV (arrowhead). In addition, several large  
519 electron-translucent vesicles (ELV) were embedded in the eukaryotic cell wall (EW). Scale bar, 0.5  $\mu$ m.

520 mitochondrion on the outer side (Fig.10D). In the inner and outer interfaces, three and two pairs of  
521 contorted membranes were being synthesized respectively by fusion of dense-margined vesicles:  
522 among the three pairs of membranes, the outer and middle ones were the segments of  
523 mitochondria envelope and chloroplast envelope respectively, while the inner one was likely the  
524 envelope of the next mitochondrion that appeared to be in preparation; likewise the two pairs of  
525 membranes were the outer side and inner side mitochondria envelope of the bulky and small  
526 mitochondria respectively (Fig.10D).

527       The above results indicated that mitochondria were assembled in the periphery of primitive  
528 chloroplast by encapsulating selected components with the membranes derived from the primitive  
529 eukaryotic thylakoids. As the assembly nearly finished, the chloroplast envelope opened up at the  
530 ventral side allowing mitochondria to detach by twisting, and then resealed by incorporating the  
531 membrane segment concurrently synthesized with the mitochondrial envelope. Since mitochondria  
532 were always assembled in the ventral side of primitive chloroplast where a large nucleoid-like  
533 structure situated (Fig.10C), it seemed likely that DNA was synthesized in the nucleoid-like  
534 structure and subsequently sorted into the mitochondria.

### 535 **Transition of mitochondria into vacuoles and degradation of primitive** 536 **eukaryotic thylakoids-derived vesicles**

#### 537 **Transition of mitochondria into double-membraned vacuoles**

538 Following the emergence of new mitochondrion, the opaque matrix of previously formed  
539 mitochondria began to self-degrade into electron-transparent material (Fig.11A), such that the  
540 mitochondria turned into double-membraned vacuoles (V) with electron-transparent matrix,  
541 containing incompletely degraded internal body, vesicle and cristae (Fig. 11B). Most of the  
542 residual inclusions were further degraded into electron-dense debris (ED) (Fig.11C) and released  
543 into the eukaryotic cytoplasmic matrix (Fig. 11D); while some internal bodies themselves also  
544 contained small internal bodies, so after degradation of their contents, the residual membranes (Fig.  
545 11D) were collected into multilamellar bodies [46-47] (Fig, 11 E and F). Accompanying the  
546 development of vacuoles, a new mitochondrion was assembled at the edge of primitive chloroplast  
547 (Fig.11B); a piece of chloroplast debris (CD) emerged in the eukaryotic cytoplasmic matrix  
548 (Fig.11B); and lipid droplets formed intensively on the inner membrane of cytoplasmic envelope  
549 and the outer membrane of primitive chloroplast envelope (Fig.11B,C,D,E,F).

#### 550 **Formation and degradation of primitive eukaryotic thylakoids-derived vesicles and** 551 **coalescence of vacuoles**

552 After vacuoles came into being, the short fragmented primitive eukaryotic thylakoids that were  
553 generated during assembly of mitochondria curled and ‘rolled up’ into “vesicle within vesicle” like  
554 compound vesicles (CPV) (Fig.12 A,B and C), which were internalized by vacuoles directly as  
555 they segregated from the primitive chloroplast (Fig. 12C), or after they shed into the eukaryotic



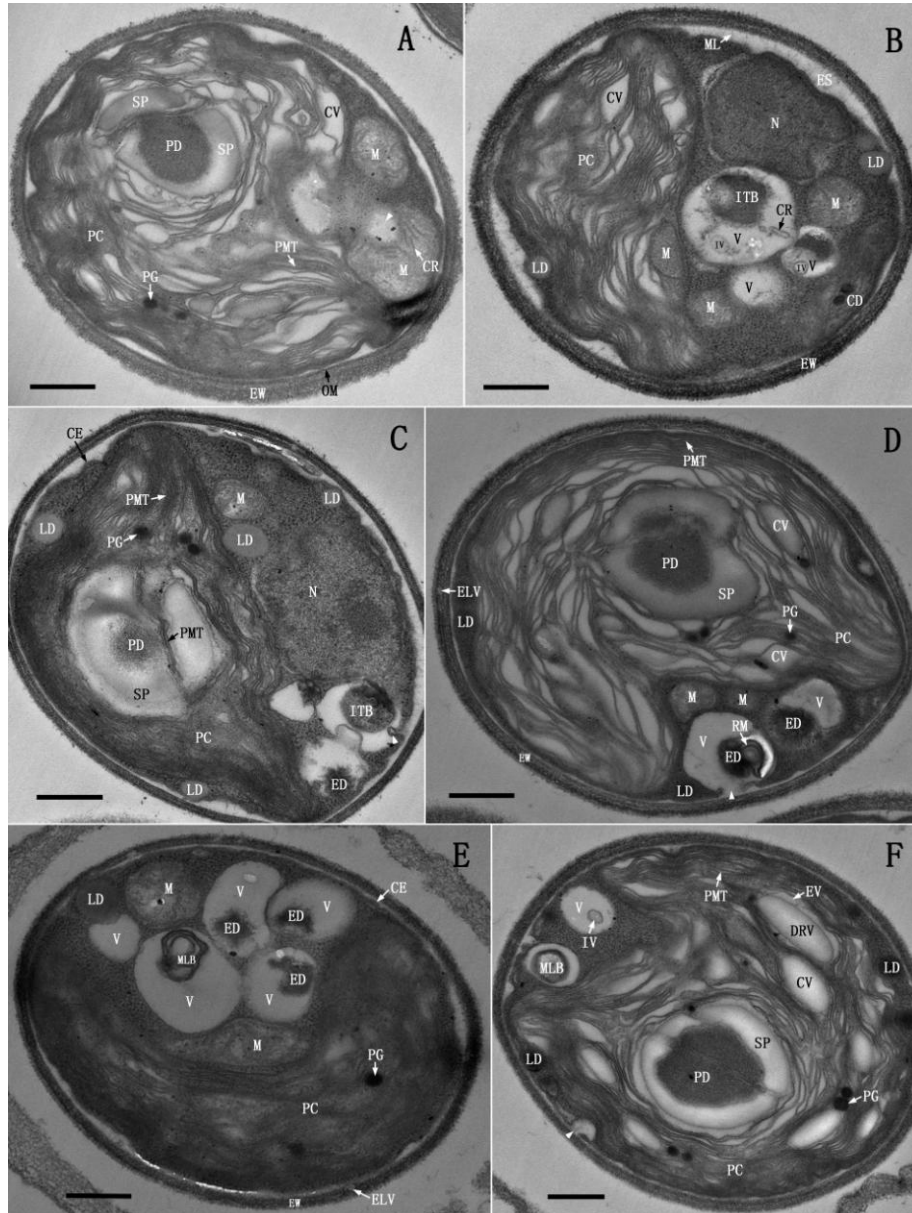

556

557 **Figure 11. Transition of mitochondria into double-membraned vacuoles (day 8-9).** (A) The matrix of a mitochondrion was being  
 558 degraded (arrowhead). (B) After matrix degradation, the mitochondria turned into vacuoles (V) containing internal body (ITB), internal  
 559 internal vesicle (IV) and remnant cristae (CR) or only electron-transparent matrix. Meanwhile, a new mitochondrion was developed in the  
 560 primitive chloroplast (PC), a lipid droplet (LD) was formed at the inner leaflet of cytoplasmic envelope (CE) and a piece of chloroplast  
 561 debris (CD) emerged in the eukaryotic cytoplasmic matrix (EM). (C) ITB in two small vacuoles degraded into electron-dense debris (ED);  
 562 while ITB in the large vacuole remained intact, the vacuolar membranes fused with CE and invaginated (arrowhead). (D) a small vacuole  
 563 expelled ED into EM; while a large vacuole sequestered some residual membranes (RM), the membranes of which fused with CE,  
 564 resulting in an opening (arrowhead). (E) A large vacuole contained a multilamellar body (MLB). (F) Two vacuoles contained a MLB and  
 565 an IV respectively. A small vacuole fused with CE, resulting in an opening (arrowhead); while several dilated ring-shaped vesicles (DRV)  
 566 emerged in electron-transparent vesicles (EV). Scale bar, 0.5  $\mu$ m.

567 cytoplasmic matrix (Fig.12A and B). And then contents of the internalized compound vesicles  
 568 were degraded, while the remaining membranes stacked up into multilamellar bodies within the  
 569 vacuoles (Fig. 12D, E and F), which began to fuse with each other by membrane protrusion. As

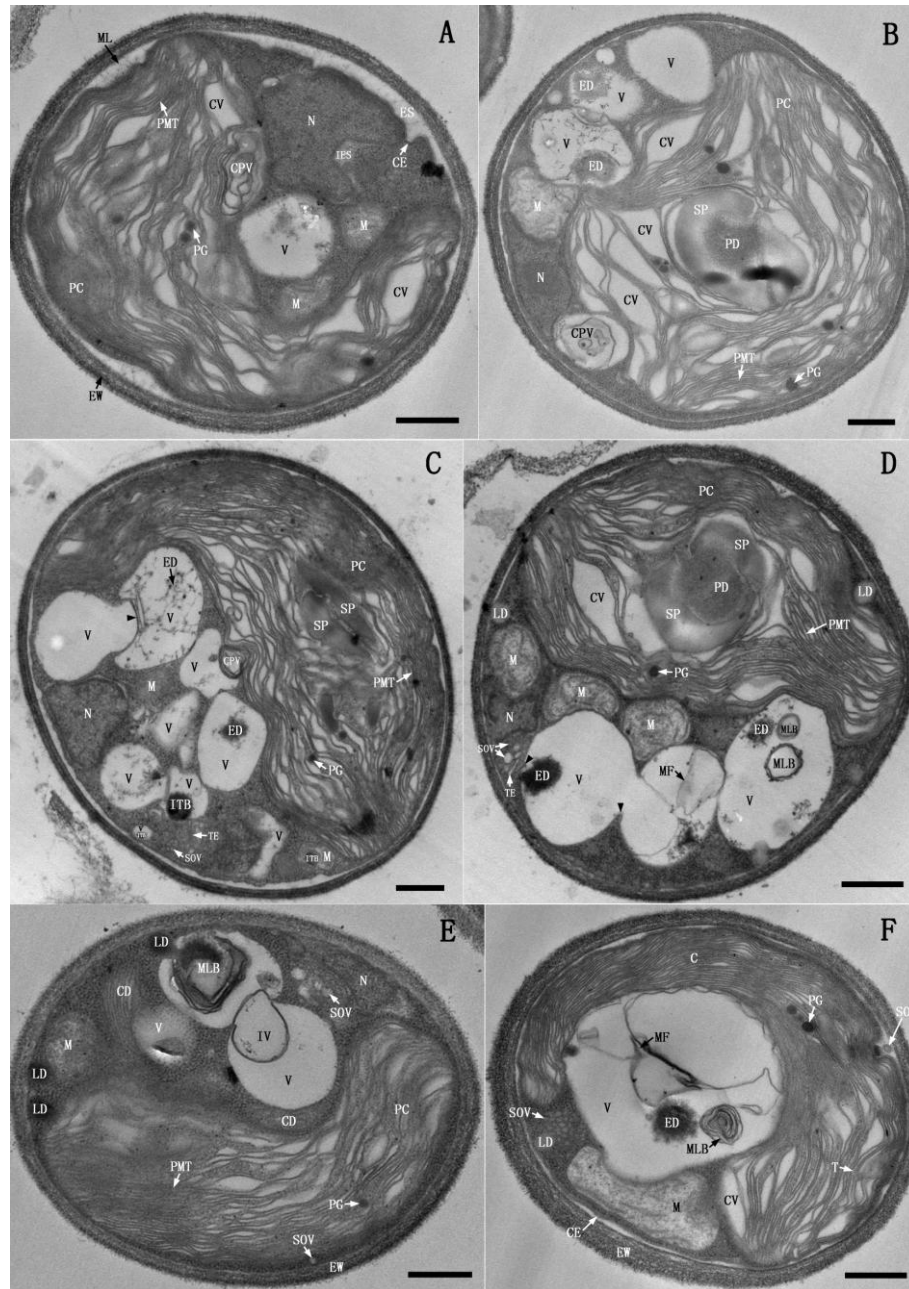

570

571 **Figure 12. Formation and degradation of primitive eukaryotic thylakoids-derived vesicles and coalescence of vacuoles (day 8-9).**

572 (A) A collection of short primitive eukaryotic thylakoids (PMT) ‘rolled up’ into “vesicle within vesicle” like compound vesicle (CPV) in  
573 the margin of primitive chloroplast (PC). (B) A CPV was segregating from PC into the eukaryotic cytoplasmic matrix (EM). (C) A CPV  
574 was detaching from PC into a vacuole; while a large vacuole protruded into another one (arrowhead). (D) Membranes of the protruded  
575 vacuole and the vacuole that contained membranous fragments (MF) fused at their contact site (arrowhead). (E) Two vacuoles were  
576 merging; while a conspicuous piece of chloroplast debris (CD) presented in EM. (F) PC matured into a chloroplast (C); all vacuoles  
577 coalesced into a single vacuole containing electron-dense debris (ED), MF and MLB. Scale bar, 0.5  $\mu$ m.

578 shown in Fig. 12C and D, a vacuole protruded into another one and fused at the contact sites, such  
579 that the membrane protrusion pinched off and became an internal vesicle (Fig. 12E) or shed as  
580 membrane fragments (Fig. 12 D and F). When the primitive chloroplast dwindled to a normal size,  
581 no more mitochondria and compound vesicles were produced and all vacuoles coalesced into a

582 large one (Fig.12F). Accordingly, the primitive chloroplast got matured into chloroplast (C), and  
583 the primitive eukaryotic thylakoids matured into eukaryotic thylakoids (T).

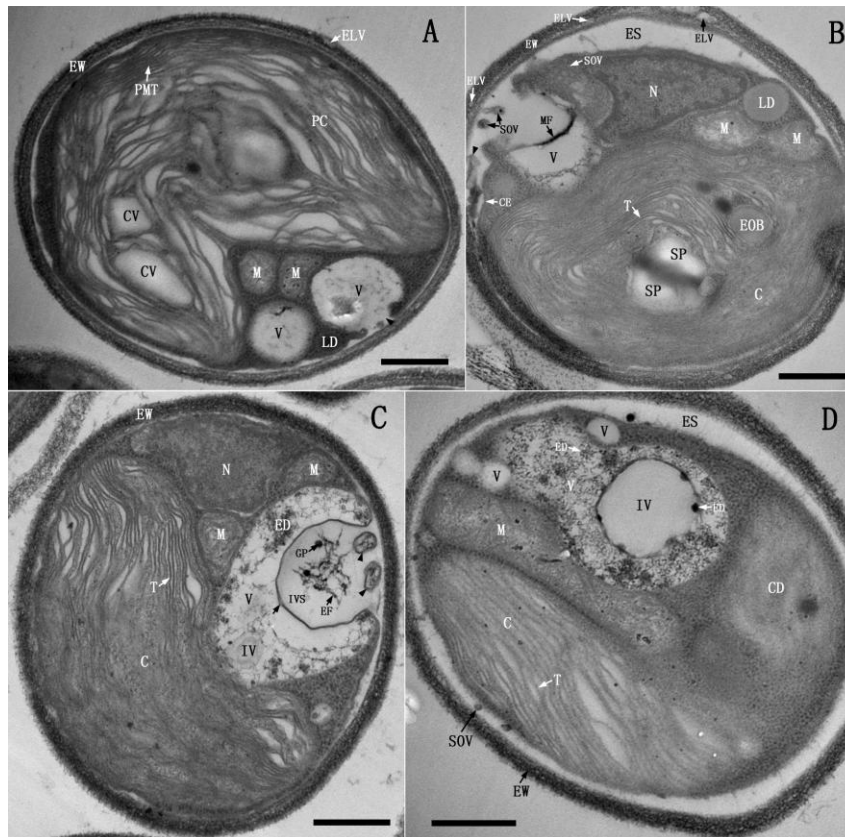

584

585 **Figure 13. Vacuole mediated unconventional exocytosis and endocytosis (day 8-9).** (A) An opening was formed at the contact site of  
586 the vacuolar membranes and cytoplasmic envelope (CE) (arrowhead), from which the vacuolar content was released. (B) The contacted  
587 vacuolar membranes and CE broke up into fragments (arrowhead), resulting in a wide opening, from which the soluble contents and small  
588 opaque vesicle (SOV) were expelled outside into the extracytoplasmic space (ES). (C) The vacuolar membranes merged with CE at two  
589 distant sites and then invaginated, resulting in a large invaginated space (IVS) entrapping some electron-dense fibrils (FB) and globular  
590 particles (GP); while CE between the two merged sites disrupted and coiled into membranous structures (arrowhead). It was clear that the  
591 vacuolar membranes consisted of two unit membranes (arrow). (D) A vacuole contained a large internal vesicle (IV). Scale bar, 0.5  $\mu\text{m}$ .

## 592 **Vacuole mediated unconventional exocytosis and endocytosis**

### 593 **Vacuole-mediated unconventional exocytosis**

594 Vacuoles came into contact with the cytoplasmic envelope, and then the contacted membranes  
595 fused or broke up into fragments resulting in openings, from which a small quantity (Fig. 11D, F  
596 and Fig. 13A) or a large amount of vacuolar contents and small opaque vesicles that seemed to be  
597 internalized from the neighboring vesicle clusters were expelled into the extracytoplasmic space  
598 (Fig.13B). Apparently, vacuole-mediated exocytosis was unconventional exocytosis [48-50], as  
599 the exocytotic proteins were not sorted through Golgi apparatus.

600 **Vacuole-mediated unconventional endocytosis**

601 The vacuolar membranes merged with cytoplasmic envelope at two distant sites and then  
602 invaginated, resulting in a large invaginated space (IVS), entrapping some electron-dense fibrils  
603 (EF) and globular particles (GP); while cytoplasmic envelope between the two merged sites  
604 disrupted and coiled into membranous structures (Fig.13C). Upon the invaginated space reaching  
605 a certain size, the membrane invagination pinched off into the vacuole lumen and became a large  
606 internal vesicle (vacuole?), whose content was degraded in situ or discharged into the vacuole  
607 lumen (Fig.13D). In the same way, the nascent vacuoles also mediated small episode of  
608 endocytosis (Fig.10D and Fig.11C). Evidently, vacuole-mediated endocytosis was unconventional  
609 endocytosis, as there was no other organelle involved.

610 **Transition of TDX16 into an eukaryotic alga TDX16-DE**

611 After bulk exocytosis and endocytosis, the large vacuoles vanished and no other organelle was  
612 formed. Thus, the prokaryotic cyanobacterium TDX16 (Fig.2-3) turned into a stable eukaryotic  
613 alga TDX16-DE with unique structure (Fig.14A, B and C). TDX16-DE cell has an eukaryotic cell  
614 wall, an extracytoplasmic space and a double-membraned cytoplasmic envelope, contains a  
615 chloroplast, a nucleus with two set of envelopes, two mitochondria, and no or several  
616 double-membraned vacuoles, but lacks endoplasmic reticulum, Golgi apparatus and peroxisome.

617 The nucleus still retains ribosomes (Fig.14A, B and C), indicating its capability of protein  
618 synthesis. The nuclear envelope and outer nuclear envelope have no visible pores and usually  
619 connect with the cytoplasmic envelope at the opening of chloroplast cavity (Fig.14A). When they  
620 are separated, a number of electron-dense vesicles (EDV) bud from the nuclear envelope into the  
621 interenvelope space, which fuse with and re-bud from the outer nuclear envelope and ultimately  
622 migrate to the two sides of chloroplast envelope and cytoplasmic envelope (Fig.14B), probably  
623 transferring nucleus-synthesized proteins for membrane renewal. Meanwhile, several openings are  
624 formed on the outer nuclear envelope, one of which is at the site where it merges with the  
625 cytoplasmic envelope. Such that, the eukaryotic cytoplasmic matrix and extracytoplasmic space is  
626 connected through the interenvelope space, enabling the exchange of metabolites between these  
627 two compartments (e.g., protein secretion) (Fig. 14B). By contrast, when the outer nuclear  
628 envelope and nuclear envelope come into contact, they disrupt at several sites and result in

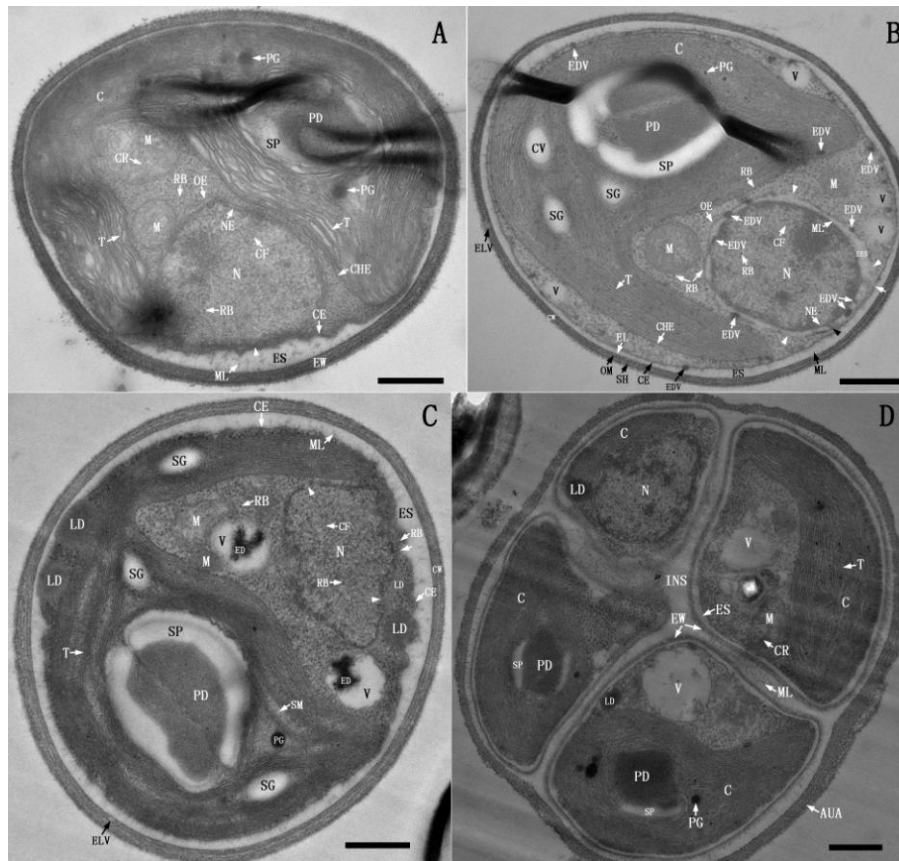

629

630 **Figure 14. Structure and reproduction of TDX16-DE (day 9-10).** (A), (B) and (C). Three TDX16-DE cells contain chloroplasts (C),  
631 nuclei (N) with chromatin fibers (CF) and ribosomes (RB), mitochondria (M) and vacuoles (v) ((A) had no vacuole). (A) The nuclear  
632 envelope (NE) and outer nuclear envelope (OE) contact the cytoplasmic envelope (CE) at the opening of chloroplast cavity (arrowhead).  
633 (B) Electron-dense vesicles (EDV) bud from NE (black arrowhead) into inter envelope space (IES), and then fuse with and re-bud from  
634 OE, ultimately reach the two sides of chloroplast envelope (CHE) and CE. There are several openings on OE (white arrowhead), and one  
635 opening at the contact site of OE and CE (arrow). (C) OE and NE contact intimately, on which large openings (arrowhead) are formed,  
636 and also a fusion pore is developed at the contact site of NE, OE and CE (arrow). (D) Four autospores in an autosporangium (AUA) are  
637 segregated from each other by the wide interspace (INS). Scale bar, 0.5  $\mu$ m.

638 openings, allowing nucleocytoplasmic transport (Fig.14C), and fuse with the cytoplasmic  
639 envelope at one site resulting in a fusion pore, enabling the direct communication between nucleus  
640 and extracytoplasmic space.

641 TDX16-DE multiplies via autospore. As shown in Fig.14D, four autospores (TDX16-DE  
642 cells) within an autosporangium (AUA) are in different developmental stages and more or less  
643 similar in arrangement to TDX16 (endospores) in the sporangium (Fig.2).

## 644 **Photosynthetic pigments of TDX16 and TDX16-DE**

645 In vivo absorption spectra (Fig.15A) showed that apart from the absorption maxima of chlorophyll  
646 a (Chl a) at 440 and 680 nm, TDX16 displayed a prominent peak at 630nm, corresponding to

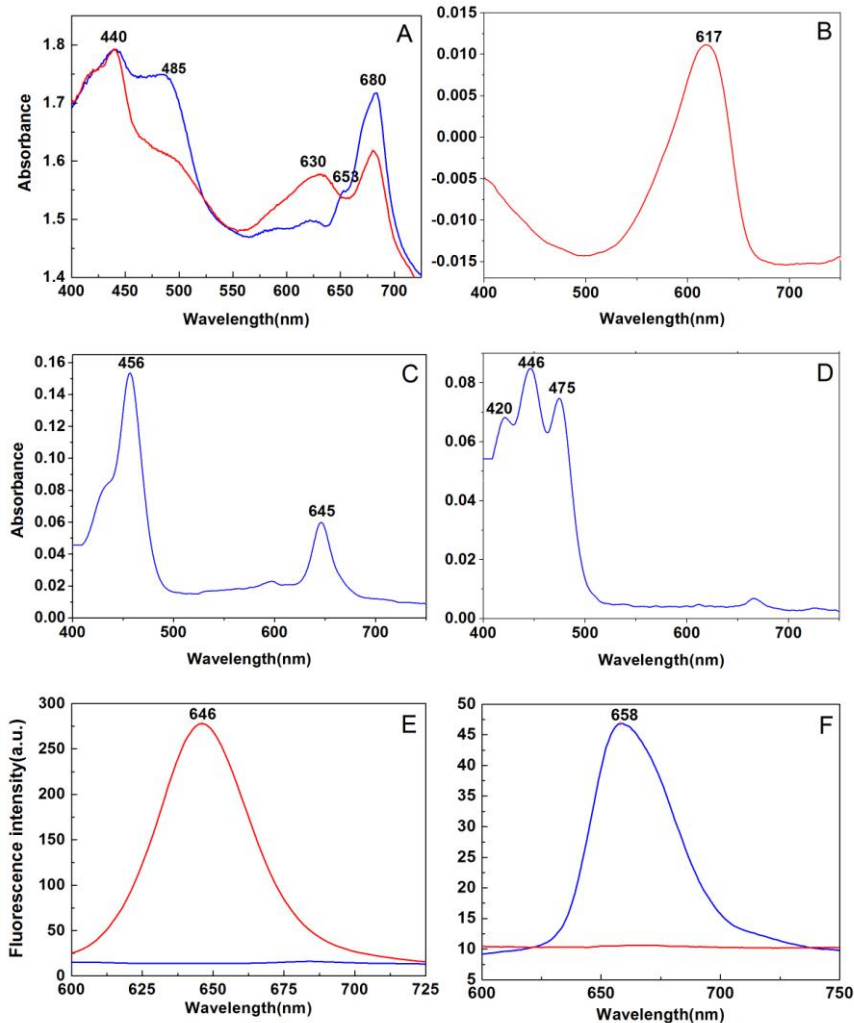

647

648 **Figure 15. Absorption and fluorescence emission spectra.** (A) In vivo absorption spectra of TDX16 (red) and TDX16-DE cell (blue).  
649 Absorption spectra of the isolated and purified phycocyanin (B), chlorophyll b (C) and lutein (D). Fluorescence emission spectra of water  
650 soluble pigment extracts (E) and lipid soluble pigment extracts (F) of TDX16 (red) and TDX16-DE cell (blue).

651 phycocyanin [51]; while TDX16-DE cell lacked phycocyanin peak at 630nm but exhibited a  
652 conspicuous shoulder peak of chlorophyll b (Chl b) at 653 nm [52], and a merged peak of  
653 carotenoids around 485 nm. Consistently, fluorescence emission spectroscopy indicated that the  
654 water soluble pigment extract of TDX16 (Fig. 15E) and lipid soluble pigment extract of  
655 TDX16-DE (Fig. 15F) displayed an emission peak of phycocyanin at 646 nm [53] and an emission  
656 peak of Chl b at 658 nm [54] respectively, but no emission peak was detected in the water soluble  
657 pigment extract of TDX16-DE (Fig. 15E) and lipid soluble pigment extract of TDX16 (Fig. 15F).  
658 The separated phycocyanin of TDX16 showed an absorption peak at 617nm (Fig. 15B), nearly the  
659 same as that of C-phycocyanin [53]; the purified Chl b and lutein of TDX16-DE displayed  
660 absorption peaks at 456 and 645 nm (Fig. 15C), 420, 446 and 475nm (Fig. 14D) respectively,

661 identical to those of plant pigments [55]. These results demonstrate that TDX16 contains  
662 phycocyanin but no Chl b, while TDX16-DE has Chl b but no phycocyanin.

### 663 **16S rRNAs of TDX16 and TDX16-DE chloroplast**

664 16S rRNAs of TDX16 (GenBank KJ599678.2) and TDX16-DE chloroplast (GenBank  
665 KJ612008.1) share a low identity of 83%, but show high similarities of 98% and 99% to that of  
666 *Chroococcidiopsis thermalis* (GenBank NR102464.1) and those of the chloroplasts of  
667 *Auxenochlorella protothecoides* (GenBank AY553213.1) and *Chlorella vulgaris* (GenBank  
668 AB001684.1) respectively.

### 669 **TDX16 genome**

670 TDX16 genome is 15,333,193 bp in size with an average of GC content of 55.2 % containing  
671 15,894 genes (CDS 15,756; RNA 138). This Whole Genome Shotgun project has been deposited  
672 at DDBJ/ENA/GenBank under the accession NDGV00000000. The version described in this  
673 paper is version NDGV01000000.

## 674 **Discussion**

### 675 **The reason for organelle biogenesis in TDX16**

676 Organelle biogenesis in prokaryotes is reasonable in theory. However, the formation of organelles  
677 in TDX16 may be intuitively unacceptable and suspected as an artifact of contamination with  
678 microorganisms, because (1) such an event had not been observed previously, and (2) it is  
679 assumed that organelle biogenesis in prokaryotes occurred only once in ancient time during the  
680 origin of the first eukaryotic common ancestor (discussion is in the following section). Indeed, the  
681 possibility of contamination by other microorganisms in this study can be completely excluded.  
682 Because (1) TDX16 cells used in the experiments were prepared from the pure and axenic colony  
683 (Fig. S3); (2) light microscopic observation confirmed the absence of other microorganisms in  
684 TDX16 cultures (Fig. 1); and (3) the intermediate cell structures between TDX16 and TDX16-DE  
685 (Fig. 1-14) are unprecedented and coherent, which can not be generated by any other  
686 microorganisms. Such that, a key question arises as to why organelles formed in TDX16 ?

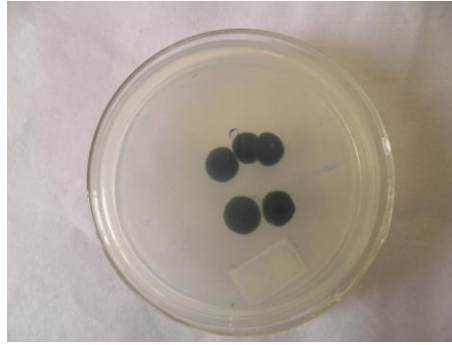

Fig. S3. Image of TDX16 colonies in an inverted petri dish

687

688

689 The consistent results of cell morphology and color (Fig. S1 and Fig. 1A.), structure (Fig. S2  
690 and Fig.2-3), pigmentation (Fig.15) and 16S rRNA sequence indicate that TDX16 is a  
691 phycocyanin-containing cyanobacterium resembling *C. thermalis*. However, the size, gene number  
692 and GC content of TDX16 genome (GenBank NDGV00000000) are 2.4, 2.8 and 1.2 times those  
693 of *C. thermalis* (6,315,792 bp, 5593 genes and 44.4% GC, GenBank CP003597.1), respectively. In  
694 addition, comparisons with genomes of other prokaryotes and unicellular green algae (eukaryotes)  
695 sequenced so far show that (1) TDX16 genome is the largest prokaryote genome and even larger  
696 than that of green alga *Ostreococcus tauri* (12.56MB, GenBank CAID00000000.1), and (2) gene  
697 number of TDX16 genome is much larger than those of other cyanobacteria, and larger than those  
698 of unicellular green algae, including *Chlamydomonas reinhardtii* (15,143 genes, GenBank  
699 NW\_001843471), the close relative of *H. pluvialis*. These results demonstrated that TDX16 had  
700 obtained a huge number of eukaryotic genes that have higher GC contents than the prokaryotic  
701 ones. Because (1) TDX16 multiplied in the senescent/necrotic *H. pluvialis* cell at the expense of  
702 host's degraded organelles and cytoplasmic matrix (Fig.S2), and (2) Chl b and lutein, the typical  
703 pigments of green algae, are absent in TDX16 but present in TDX16-DE (Fig. 15), it is certain that  
704 TDX16 had acquired 9,017,401bp DNAs with 10301 genes from its dead green algal host *H.*  
705 *pluvialis*. Accordingly, organelle biogenesis in TDX16 resulted from hybridizing the acquired  
706 DNAs with its own ones and expressing the hybrid genome. Since this study focuses on the  
707 cellular mechanism of organelle biogenesis in TDX16, we are unable to elucidate the molecular  
708 mechanism here, but infer the molecular process based on the changes of cellular structure:  
709 (1) when the bloated *H. pluvialis* cells underwent senescence/necrosis (Fig. S1), the tiny dormant  
710 endosymbiotic cyanobacterium TDX16 was activated, which took up host's DNAs and retained  
711 the acquired DNAs most likely in the unique replicable heterogenous globular body so as to keep



712 from degradation (Fig. S2). After the small TDX16 cells were liberated from the ruptured host cell  
713 (Fig. S1), the heterogenous globular body with electron-dense DNA-like materials situated in the  
714 nucleoid and seemed to be a “micronucleus” (Fig. 2).

715 (2) upon compartmentalization, the obtained DNAs were released gradually from the heterogenous  
716 globular body into the nucleoid (Fig. 4), most of which kept inactive because the initially formed  
717 primary thylakoids were cyanobacterial ones (Fig.5) similar to those of *Chroococcidiopsis* [13],  
718 owing to expression of TDX16’s own genes that were suppressed within the host cell and in the  
719 dim light.

720 (3) during de-compartmentalization the total DNAs in the solubilized inner cytoplasm fragmented,  
721 intermingled (hybridized) (Fig.6), which was then partitioned into the new intracytoplasmic space  
722 (major fraction) and new inner cytoplasm (minor fraction) during re-compartmentalization (Fig.7),  
723 and subsequently gave rise to nuclear genome (Fig.8-9) and primitive chloroplast genome (Fig.8)  
724 respectively. Hereafter, the primitive chloroplast genome partitioned into chloroplast genome and  
725 mitochondrial genome during assembly of mitochondria (Fig. 9-11). The disappearance of  
726 phycocyanin (Fig.15) and TDX16 16S rRNA, but appearance of chlorophyll b, lutein (Fig.15) and  
727 new 16S rRNA of TDX16-DE chloroplast indicated that DNA hybridization resulted in the loss of  
728 prokaryotic genes, retention of eukaryotic genes and synthesis of new (hybrid) genes.

## 729 **Organelle biogenesis in TDX16 sheds light on eukaryotes**

730 Organelle biogenesis in the prokaryote TDX16 (Fig. 2-13) resulted in its transition into an  
731 eukaryote TDX16-DE (Fig. 14), that is to say, the organelles of eukaryote TDX16-DE were  
732 originally formed in the prokaryote TDX16. So, the biogenesis of organelles in TDX16 provides a  
733 reference for re-understanding the development, structure, function and association of organelles  
734 and other compartments in eukaryotes and the reasons behind them.

## 735 **Formation of different DNA-containing organelles all at once**

736 With the initial compartmentalization (Fig. 4) and subsequent de-and re-compartmentalization  
737 (Fig.6-7), the whole cellular content of TDX16 was allocated into the only two compartments: the  
738 new intracytoplasmic space and the new inner cytoplasm (Fig.7), from which nucleus, chloroplast  
739 and mitochondrion were developed respectively. (Fig.8-11). Therefore, different DNA-containing

740 organelles in TDX-DE were formed all at once in a single development event with concurrent  
741 establishment of interorganellar metabolic link and communication as evidenced by the viability  
742 of TDX16-DE. Accordingly, the interorganellar signaling (control) is a multilateral system,  
743 encompassing not only anterograde signaling (nucleus-to-chloroplast/mitochondrion) and  
744 retrograde (chloroplast/mitochondrion-to-nucleus) signaling [56-58], but also  
745 chloroplast-to-mitochondrion signaling [59] and mitochondrion-to-chloroplast signaling.

#### 746 **The number of membranes enclosing the DNA-containing organelles**

747 Chloroplast, nucleus and mitochondrion were all formed in TDX16 by encapsulating the relevant  
748 components with the membranes synthesized by fusion, flatten and extension of the small vesicles  
749 (Fig. 6-10). Such that, the envelopes of these DNA-containing organelles inevitably comprise two  
750 unit membranes if the vesicles are bounded by one unit membrane, but four unit membranes, such  
751 as the nuclear envelop of TDX16-DE (Fig.14) and the chloroplast envelopes of some algae  
752 [60-62], if the vesicles are bounded by two unit membranes.

#### 753 **Uneven DNA distribution and promiscuous DNA sequences among organelles**

754 During de-and re-compartmentalization the total DNAs in TDX16 aggregated (hybridized) and  
755 were partitioned into the new intracytoplasmic space (major fraction) and the new inner cytoplasm  
756 (minor fraction) (Fig.6-7). The former's matrix was then encapsulated into the nucleus (Fig.8),  
757 while the latter subsequently gave rise to chloroplast and mitochondrion (Fig.8-12). So, nucleus  
758 sequestered most of the cellular DNAs, while chloroplast and mitochondrion contained only a  
759 handful of DNAs. Accordingly, DNA partition during organelle biogenesis in prokaryotes is the  
760 cause for uneven DNA distribution among organelles in eukaryotes, and likely also the cause for  
761 promiscuous DNA sequences: chloroplast and mitochondrial sequences in nucleus [63], nuclear  
762 and chloroplast sequences in mitochondrion [64-66], and nuclear and mitochondrial sequences in  
763 chloroplast[67-71], which are usually interpreted as interorganellar, intracellular or horizontal  
764 (DNA/gene) sequence transfers.

#### 765 **The common origin of eukaryotic cytoplasmic matrix and nuclear matrix**

766 After formation of the two transitional composite organelles, the eukaryotic cytoplasmic matrix  
767 was built up from the matrix extruded by the primitive nucleus (Fig.9), indicating the common  
768 origin of eukaryotic cytoplasmic matrix and nuclear matrix (nucleoplasm). Therefore, it is not  
769 surprising that (1) most of nucleus-encoded proteins are synthesized in the eukaryotic cytoplasmic

770 matrix, (2) some nucleus-encoded proteins are synthesized locally in the nuclear matrix of  
771 TDX16-DE as indicated by the presence of ribosome (Fig.14) and the nuclei of other cells  
772 (nuclear translation) [72-77], and (3) during open mitosis, (A) nucleus but not mitochondrion or  
773 chloroplast disassembles, (B) nuclear matrix and eukaryotic cytoplasmic matrix coalesce into one  
774 compartment (the reverse process of their formation), and (C) daughter nuclei form by de novo  
775 assembly of nuclear envelop (in this regard, daughter nuclei form de novo). Accordingly, the  
776 eukaryotic cytoplasmic matrix and nuclear matrix is in essence a dynamic entity, and thus we  
777 define them as the nucleocytoplasmic matrix.

### 778 **Development of mitochondria in the primitive chloroplasts**

779 Mitochondria were assembled in and segregated from the primitive chloroplast in TDX16 (Fig.  
780 9-11), demonstrating that mitochondria and chloroplasts developed from the same intermediate  
781 organelle, which is the reason why (1) chloroplast and mitochondrial genomes share similar  
782 features [78], and have widespread homologies and some same DNA sequences [79-80], (2)  
783 mitochondria contain specific chloroplast proteins [81], and (3) chloroplasts possess respiratory  
784 electron transfer chains for chlororespiration [82-83].

785 The presence of mitochondria in chloroplasts [84-89] and detachment of mitochondria or  
786 mitochondrion-like bodies from chloroplasts [90-92] have been observed frequently in plant cells.  
787 However, these phenomena have largely been overlooked and whether the chloroplast-localized  
788 mitochondria were developed in or engulfed by the chloroplast remains controversial. In light of  
789 the assembly of mitochondria in the primitive chloroplast of TDX16, it is likely that the impaired  
790 mitochondria entered the chloroplast and dismantled, allowing the mixture of mitochondrial  
791 matrix and chloroplast stroma (the reverse process of their formation). Such that the chloroplast  
792 became a primitive-chloroplast-like composite organelle, in and from which new mitochondria  
793 were assembled and segregated. Thus, assembly of mitochondria in chloroplast is, in principle,  
794 similar to development of daughter nuclei in nucleocytoplasmic matrix during open mitosis, which  
795 occurs in the plant cells that probably contain only impaired mitochondria under stress conditions.

### 796 **Transition of mitochondria into double-membraned vacuoles**

797 Mitochondria in TDX16 turned into double-membraned vacuoles after matrix degradation (Fig.11).  
798 Currently, mitochondrion in plant cells is thought to be degraded only by autophagy (mitophagy),  
799 which is selectively enclosed by the phagophore (isolation membrane) into a double-membraned

800 autophagosome, and then delivered into the single-membraned vacuole for degradation. This way  
801 of mitochondrion degradation is, however, unachievable in TDX16 cell, because (1)  
802 autophagosome can not be formed owing to the lack of endoplasmic reticulum, which is proposed  
803 to be the membrane source for phagophore synthesis in plant cells[93], and (2) there is no vacuole,  
804 which is also developed from scratch.

805 The cellular mechanism of vacuole biogenesis in plant cell is unclear, while the vacuolar  
806 membrane is presumably sourced from Golgi apparatus[94] or endoplasmic reticulum[10], both of  
807 which are devoid in TDX16 and TDX16-DE. So, mitochondrion-to-vacuole transition in TDX16  
808 is an alternative way of mitochondrion degradation and vacuole formation, while the hydrolytic  
809 enzymes were probably stored in and released from mitochondria' internal bodies (Fig.10-11).  
810 Since double-membraned vacuoles also present in plant cells [95-96], it is certain that transition of  
811 mitochondria or other organelles (e.g., autophagosomes) into double-membraned vacuoles occur  
812 in plant cells under specific conditions.

813 Different from the single-membraned vacuoles in plant cells, the double-membraned vacuoles  
814 in TDX16-DE serve both as a degradative and as a secretory compartment, similar in function to  
815 the secretory lysosomes in animal cells [6-7]. Since mitochondria-produced vesicles contribute to  
816 the generation of peroxisomes [5], it is possible that the mitochondria-derived double-membraned  
817 vacuoles in TDX16-DE also play the roles of peroxisomes.

### 818 **Formation of different thylakoids**

819 Thylakoids are photosynthetic apparatus and vital for cell maintenance and organelle development.  
820 So, concomitant with compartmentalization, de-and re-compartmentalization were the  
821 assembly/disassembly of primary and secondary thylakoids in the transitional compartments and  
822 finally development of primitive eukaryotic thylakoids in the primitive chloroplast (Fig.4-8).

823 (1) The primary thylakoids developed from the electron-transparent vesicles formed by  
824 “germination” of osmiophilic granules (Fig.4-5). Thus, (A) osmiophilic granules are the  
825 precursors of thylakoids in cyanobacteria, which is why there is no osmiophilic granule in the  
826 thylakoid-less cyanobacterium *G. violaceus* [30]; (B) osmiophilic granules consist of two rather  
827 than one half unit membrane; and (C) the intralamellar vesicles of cyanobacteria [97-99] are  
828 premature thylakoids developed from osmiophilic granules.

829 (2) The secondary thylakoids developed from the primary thylakoid-derived vesicles (Fig.7), in a

830 manner similar to re-development of thylakoids from the former thylakoid-derived vesicles or  
831 segments in the stress-experienced cyanobacterial cells and germinated akinetes [17,100].  
832 Nevertheless, the absence of phycobilisomes in secondary thylakoids suggested that the primary  
833 thylakoid-derived vesicles were modified in composition.

834 (3) The primitive eukaryotic thylakoids developed from the plastoglobuli produced during  
835 disassembly of secondary thylakoids in the same way as the development of primary thylakoids  
836 from the osmiophilic granules (Fig.8). Therefore (A) plastoglobuli are identical to osmiophilic  
837 granules in structure but different in composition, and (B) plastoglobuli are the precursors of  
838 chloroplast thylakoids, which is why their number increases during thylakoid breakdown but  
839 decreases during thylakoid development [25, 101].

#### 840 **The double-membraned cytoplasmic envelope of TDX16-DE**

841 TDX16-DE's double-membraned cytoplasmic envelope was formed in TDX16 by combination of  
842 the outer intracytoplasmic membrane with the cytoplasmic membrane after degradation of the  
843 outer cytoplasm (Fig. 4), the two membranes of which were closely appressed in most cases and  
844 thus difficult to distinguish without being aware of the developmental process.

845 As a matter of fact, double membraned cytoplasmic envelopes seem also present in other  
846 unicellular green algae, particularly picoalgae (cell size less than 3  $\mu\text{m}$ ), which are ignored or  
847 thought to be the two layers of a unit membrane. For examples, *Nanochlorum eucaryotum*,  
848 *Nannochloris coccooides* [102], *Chlorella fusca* [42] and *Chloroparva pannonica* [103] apparently  
849 have double-membraned cytoplasmic envelopes akin to that of TDX16-DE, while *Pseudochloris*  
850 *willhelmii*[104], *Nannochloropsis oceanica*[105], and *Chlorella sp*[106-108] seem also to be the  
851 case. Picoalgae are very simple in structure, containing a minimal set of organelles. For examples,  
852 the picoalgae [109-117] all lack endoplasmic reticulum, most of which also lack Golgi apparatus  
853 [109-111, 114-115], and few of which lack endoplasmic reticulum, Golgi apparatus and  
854 peroxisome [116-117] and even vacuole [117]. These results suggest that endoplasmic reticulum,  
855 Golgi apparatus and peroxisome are not essential and their functions can be performed in other  
856 compartments, similar to performance of mitochondrial function in cytoplasmic matrix of the  
857 mitochondrion-less eukaryote *Monocercomonoides sp*[118].

858 TDX16-DE is very small (2.9-3.6  $\mu\text{m}$ ) and bears strong resemblances to picoalgae in cell  
859 morphology, structure, organelle number and arrangement, though 16S rRNA sequence of its

860 chloroplast shows high similarity to those of the chloroplasts of *A. protothecoides* and *C. vulgaris*.  
861 In TDX16-DE cells, the attachment of ribosomes to and assembly of lipid droplets on the inner  
862 membrane of cytoplasmic envelop (Fig.10-14) indicate that the cytoplasmic envelop serves the  
863 functions of endoplasmic reticulum for synthesizing proteins and lipids. And the proteins  
864 synthesized on the inner membrane can be used locally for remodeling the cytoplasmic envelop  
865 without sorting and secreted into the extracytoplasmic space directly with no need for vesicular  
866 transport, and thus the cytoplasmic envelop serves the functions of Golgi apparatus as well.

### 867 **The outer membrane in the eukaryotic cell wall of TDX16-DE**

868 The eukaryotic cell wall of TDX16-DE (Fig.8-14) was developed on the base of TDX16's  
869 prokaryotic cell wall (Fig. 4) by forming sheath over the outer membrane and modifying the  
870 peptidoglycan layer into the electron-dense layer (Fig.4D-8A), and so, the outer membrane  
871 remains in the eukaryotic cell wall of TDX16-DE. Since the sheath scaled off and re-formed  
872 continuously until formation of the stratified sheath, the outer membrane where enzymes anchored  
873 was remodeled to accommodate the above changes, which along with the electron-dense layer and  
874 the sandwiched electron-transparent space constituted a trilaminar domain resembling the  
875 trilaminar sheaths [41-45, 106] in algal and plant cell walls. The trilaminar domain and the  
876 trilaminar sheaths are equivalent structures, because like cyanobacterial cell walls, algal and plant  
877 cell walls also contain lipids [43,119-122], enzymes[43-44, 123-126] and carotenoids [127-128].  
878 Accordingly, the out layers of trilaminar sheaths in algal and plant cell walls are membranes,  
879 which serve as platforms for anchoring enzymes to assemble the primary and secondary cell walls  
880 (corresponding to the sheath and the extended part of electron-dense layer in the eukaryotic cell  
881 wall of TDX-DE, respectively) and barriers for constraining lateral diffusion of cytoplasmic  
882 membrane proteins [129]; while the intermediate layers are aqueous spaces and the inner layers  
883 are porous mechanical structures.

### 884 **The extracytoplasmic space is a membrane-surrounded compartment**

885 TDX16 had an extracytoplasmic space between the cytoplasmic membrane and the outer  
886 membrane (Fig. 4A), equivalent to the periplasmic space of other prokaryotic cells [27, 130]. The  
887 extracytoplasmic space remains in TDX16-DE (Fig.14), which is surrounded by the cytoplasmic  
888 envelope and the outer membrane within the eukaryotic cell wall, and thus a genuine  
889 membrane-surrounded compartment. During biogenesis of the primitive nucleus the liquid of new

890 intracytoplasmic matrix was squeezed out into the extracytoplasmic space (Fig.8), and later the  
891 vacuoles expelled their contents into and internalized substances from it (Fig.13). So, the  
892 extracytoplasmic space plays indispensable roles and metabolically links to the eukaryotic cell  
893 wall, cytoplasmic envelope, eukaryotic cytoplasmic matrix, nucleus and vacuoles.

894 Likewise, the extracytoplasmic spaces (interspaces) between the cytoplasmic membrane and the  
895 trilaminar-sheath-containing cell wall in algal cells[41-42, 44] are also membrane-surrounded  
896 compartments, rather than the extracellular spaces (apoplasts) [131] as usually considered.

### 897 **Generation of different small bodies from the primitive chloroplast**

898 The oversized primitive chloroplast in TDX16 was the source of energy and materials for  
899 organelle development and cell maintenance, from which different small bodies generated during  
900 it dwindled into a large chloroplast.

901 (1) the vesicle-containing body was firstly developed from the primitive chloroplast and engulfed  
902 by the primitive nucleus (Fig.9A), which delivered materials for primitive nucleus maturation and  
903 formation of eukaryotic cytoplasmic matrix. The absence of visible enclosing-membrane and  
904 rectangular-shape of the vesicle-containing body suggested that it was formed most likely by  
905 incision, but not by budding or protrusion.

906 (2) the chloroplast debris with fragmented primitive thylakoids (Fig. 11B, 12E and 13D) was  
907 irregular in shape and devoid of enclosing-membrane, and thus seemed to be chipped off the  
908 primitive chloroplast during assembly of mitochondria and degraded, at least in part, in the  
909 eukaryotic cytoplasmic matrix, which originated from the primitive nucleus that was capable of  
910 degrading the vesicle-containing body.

911 (3) the compound vesicles detached from the primitive chloroplast in a way similar to that of  
912 mitochondria and transferred principally the segmented primitive eukaryotic thylakoids into  
913 vacuoles for degradation and formation of multilamellar bodies (Fig. 12).

914 These small bodies played roles in primitive chloroplast maturation, the mechanisms by which  
915 they formed apparently differed from those for developing the small bodies during the  
916 piecemeal-degradation of chloroplast, including Rubisco-containing body [132], ATI1-PS body  
917 [133] and SSGL body [134], as well as senescence-associated vacuole [135] and CV-containing  
918 vesicle [136]. Hence, generating different small bodies through different mechanisms is a strategy  
919 for both chloroplast development and chloroplast degradation.

## 920 **Implications of organelle biogenesis in TDX16**

921 This study unveils the biogenesis of organelles in cyanobacterium TDX16. Likewise, it is  
922 reasonable that organelles can also form in bacteria in the similar situations. In light of organelle  
923 biogenesis in TDX16, we postulate that organelles (no chloroplast) form in the  
924 eukaryotic-DNA-acquired bacteria by enclosing the cytoplasm into a primitive nucleus, from  
925 which mitochondria and eukaryotic cytoplasmic matrix develop. This postulation is supported by  
926 the facts that in heterotrophic eukaryotes (1) mitochondria present in nuclei [137-142], (2) nuclear  
927 genomes contain mitochondrial DNA copies [143-145], and (3) most mitochondrial proteins are  
928 descendants of nuclear genes with no bacterial antecedents [146-148]. Therefore, organelle  
929 biogenesis in TDX16 has broad implications on biology, particularly cancer biology and  
930 evolutionary biology.

### 931 **Implications on cancer biology**

932 The origin of cancer cells is the most fundamental yet unresolved problem in cancer biology.  
933 Cancer cells are thought to be transformed from the normal cells, however, recent studies reveal  
934 that the small nascent primary cancer cells (PCCs) for cancer initiation [149-153] and secondary  
935 cancer cells (SCCs) for cancer progression [151, 154-162] are formed in and but not transformed  
936 from the senescent normal cells and cancer cells, respectively. These small nascent PCCs/SCCs  
937 are very small, undifferentiated [154, 161, 163-164] and absent of organelles, which mature into  
938 eukaryotic PCCs/FCCs after being released from the ruptured senescent normal/cancer cells.  
939 Nevertheless, the cellular mechanisms of how the small nascent PCCs/SCCs formed, and how  
940 organelles developed in PCCs/SCCs are unclear. In the light of TDX16-to-TDX16-DE transition,  
941 it is most likely that PCCs/SCCs arise from bacteria [165]: the intracellular bacteria take up the  
942 senescent normal/cancer cells' DNAs and become small nascent organelle-less PCCs/SCCs, which  
943 develop into eukaryotic PCCs/SCCs by hybridizing the acquired DNAs with their own ones and  
944 expressing the hybrid genomes to guide organelle biogenesis.

### 945 **Implications on evolutionary biology**

946 The origin and diversification of organelles are two different problems in evolutionary biology.  
947 The origin of organelles is coupled to origin of eukaryotes concerning how the ancestral organelles  
948 formed in the first and last eukaryotic common ancestors. This problem is difficult to make clear



949 owing to the lack of direct evidence. Now, the endosymbiotic hypothesis [166-167] is widely  
950 accepted that an endosymbiotic eubacterium and an endosymbiotic cyanobacterium within an  
951 eukaryotic cell turned into the ancestral mitochondrion and chloroplast respectively, while an  
952 endosymbiotic archaeobacterium within an eubacterium transformed into the ancestral nucleus  
953 [168-170]. By contrast, the diversification of organelles is coupled to formation of new  
954 single-celled eukaryotes (the progenitors of multicellular eukaryotes) regarding how the new  
955 organelles form in the new single-celled eukaryotes after the formation of the first and last  
956 eukaryotic common ancestors. This problem has received little attention and remains unclear.

957 Organelle biogenesis in TDX16 (1) uncovers a way of organelle diversification and new  
958 single-celled eukaryote formation: the endosymbiotic prokaryote acquires and hybridizes its  
959 eukaryotic host's DNA with its own one and then develops into a new single-celled eukaryote by  
960 de novo biogenesis of new organelles; (2) provides clues for inferring the origin of organelles and  
961 modifying the endosymbiotic hypothesis. In light of organelle biogenesis in TDX16, it is more  
962 likely that the ancestral nucleus, mitochondrion and chloroplast were de novo formed in but not  
963 transformed from the endosymbiotic prokaryotes that had acquired their senescent/necrotic hosts'  
964 DNAs. Such that, the modified endosymbiotic theory unifies the endosymbiotic theory and  
965 autogenous theory, and accounts for both the origin and the diversification of organelles.

## 966 **Methods**

### 967 **Strain and cultivation**

968 Pure TDX16 cells were collected from the *H. pluvialis* cultures, in which all *H. pluvialis* cells  
969 burst and released TDX16 cells[11], and maintained in BG-11 liquid medium [171] at 25°C, 12  
970  $\mu\text{mol photons m}^{-2} \text{s}^{-1}$  in the illumination incubator.

971 Axenic TDX16 was prepared according to the method [172] with some modifications. Briefly,  
972 pure TDX16 culture was treated with antibiotics nystatin (100  $\mu\text{g/ml}$ ) and cycloheximide (150  
973  $\mu\text{g/ml}$ ) for 18h, then the culture was diluted 10 fold with sterile distilled water and plated onto  
974 BG-11 solid medium in petri dishes supplemented (w/v)with glucose (0.5 %), peptone (0.3 %) and  
975 yeast extracts (0.2 %). The petri dishes were sealed with Parafilm and incubated in an inverted  
976 position in the illumination incubator at 25 °C, 12  $\mu\text{mol photons m}^{-2} \text{s}^{-1}$  for one month. The  
977 colonies (Fig. S3) were picked and transferred into autoclaved 250-ml flasks containing 100 ml

978 BG-11 medium and cultivated under the same conditions as described above.

979 The obtained axenic TDX16 cultures were used in this experiment. For TDX16 transition, 10 ml  
980 axenic TDX16 culture was inoculated into each autoclaved 250-ml flask containing 100 ml BG-11  
981 medium and illuminated with continuous light of  $60 \mu\text{mol photons m}^{-2} \text{s}^{-1}$  at  $25^\circ \text{C}$ .

## 982 **Microscopy observations**

### 983 **Light microscopy**

984 TDX16 cells in cultures were examined each day with a light microscope BK6000 (Optec, China).  
985 Photomicrographs were taken under the oil immersion objective lens ( $100\times$ ) using a DV E3  
986 630 camera. Cell sizes were measured with a micrometer eyepiece.

### 987 **Transmission electron microscopy**

988 TDX16 cells were harvested each day by centrifugation (3000 rpm, 10 min) and fixed overnight in  
989 2.5% glutaraldehyde (50 mM phosphate buffer, pH7.2) and 1% osmium tetroxide (the same buffer)  
990 for 2 h at room temperature. After dehydration with ascending concentrations of ethanol, the fixed  
991 cells were embedded in Spurr's resin at  $60^\circ\text{C}$  for 24 h. Ultrathin sections (60 to 80 nm) were cut  
992 with a diamond knife, mounted on a copper grid, double-stained with 3% uranyl acetate and 0.1%  
993 lead citrate, and examined using a JEM1010 electron microscope (JEOL, Japan).

## 994 **Pigment analyses**

### 995 **In vivo absorption spectra**

996 Cell suspensions were scanned with Ultraviolet-Visible Spectrophotometer Cary 300 (Agilent,  
997 USA), the spectra were normalized to give an equal absorbance of Chl a at 440 nm.

### 998 **Fluorescence emission spectra**

999 Water soluble pigments were extracted with 0.75M K-phosphate buffer (pH= 6.8). Lipid soluble  
1000 pigments were extracted with pure acetone and diluted 50-fold into ethanol. Both extracts were  
1001 analyzed on Fluorescence Spectrophotometer F-4500 (Hitachi, Japan) at room temperature with  
1002 excitations of 580 nm and 478 nm respectively.

### 1003 **Pigment separation and identification**

1004 Chl b and lutein was separated by thin-layer chromatography according to the method described  
1005 by Lichtenthaler [55]. phycocyanin was extracted and purified following the procedures described  
1006 by Adams [173]. All pigments were analyzed with Ultraviolet-Visible Spectrophotometer Cary

1007 300 (Agilent, USA), and identified by spectroscopic matching with the published data.

## 1008 **16S rRNA sequence**

1009 DNA samples were prepared according to the method described previously [174]. 16S rRNAs  
1010 were amplified using the primers 8-27f (AGAGTTTGATCCTGGCTCAG) and 1504-1486r  
1011 (CTTGTTACGACTTCACCCC) [175]. Fragments were cloned into the pMD18-T vector and  
1012 amplified using M13 forward and reverse universal primers. The PCR products were digested with  
1013 restriction enzymes BamH1/Sall, and sequenced on ABI 3730 DNA analyzer (PerkinElmer  
1014 Biosystems, USA).

## 1015 **Genome sequence of TDX16**

1016 TDX16 cells were harvested by centrifugation at 3000 rpm for 10 min, and washed twice with 5M  
1017 NaCl solution and sterile water alternately. The pelleted cells were frozen in liquid nitrogen and  
1018 then grinded with sterile glass beads (0.5 mm diameter). The slurry was transferred into 5ml  
1019 centrifuge tube with TE buffer (1mM EDTA, 10 mM Tris-HCl, pH=8.0), supplemented with 1.0  
1020 ml lysozyme solution (20 mg/ml) and incubated at 37 °C for 60 min, then added CTAB  
1021 (Cetyltrimethyl ammonium bromide) solution (10% CTAB, 0.7 M NaCl) and heated to 65 °C for  
1022 30 min in a water bath. After centrifugation (12000 rpm, 10min), the supernatant was extracted  
1023 with one volume of phenol-chloroform-isoamyl alcohol (25:24:1, V/V), and DNA was precipitated  
1024 overnight at -20 °C after the addition of 2/3 volume of cold isopropanol and 1/10 volume of 3M  
1025 sodium acetate, dried and resuspended in TE buffer. The extracted DNA was first subjected to  
1026 quality assay and then sheared ultrasonically into fragments, with their overhangs being converted  
1027 into blunt ends applying T4 DNA polymerase, Klenow Fragment and T4 Polynucleotide Kinase.  
1028 Subsequently, adapters were ligated to the 3' ends of DNA fragments that were introduced with 'A'  
1029 bases. The obtained fragments were purified via gel-electrophoresis and PCR-amplified for  
1030 preparing the sequencing library of DNA clusters. Paired-end sequencing was carried out on an  
1031 Illumina HiSeq 4000 platform, yeilding 1.132 Mb raw data. After removal of the low quality reads,  
1032 1.009 Mb clean data was assembled with SOAPdenovo.

1033

1034

## 1035 **References**

- 1036 1. Bevis, B. J., Hammond, A. T., Reinke, C. A., and Glick, B. S (2002) De novo formation of  
1037 transitional ER sites and Golgi structures in *Pichia pastoris*. *Nature Cell Biol.* 4: 750–756
- 1038 2. South, S. T and Gould, S. J (1999) Peroxisome Synthesis in the Absence of Preexisting  
1039 Peroxisomes. *J. Cell Biol.* 144: 255–266
- 1040 3. Kim, P. K., Mullen, R. T., Schumann, U and Lippincott-Schwartz, J (2006) The origin and  
1041 maintenance of mammalian peroxisomes involves a de novo PEX16-dependent pathway from  
1042 the ER. *J. Cell Biol.* 173: 521–532
- 1043 4. van der Zand, A., Gent, J., Braakman, I and Tabak, H. F (2012) Biochemically distinct vesicles  
1044 from the endoplasmic reticulum fuse to form peroxisomes. *Cell* 149: 397–409.
- 1045 5. Sugiura, A., Mattie, S., Prudent, J and McBride, H. M (2017) Newly born peroxisomes are a  
1046 hybrid of mitochondrial and ER-derived pre-peroxisomes. *Nature* 542: 251–254
- 1047 6. Stinchcombe, J. C., Page, L. J and Griffiths, G. M (2000) Secretory lysosome biogenesis in  
1048 cytotoxic T lymphocytes from normal and Chediak–Higashi syndrome patients. *Traffic* 1:  
1049 435–444.
- 1050 7. Liu, D. F., Xu, L., Yang, F., Li, D.D., Gong, FL and Xu, T (2005) Rapid biogenesis and  
1051 sensitization of secretory lysosomes in NK cells mediated by target-cell recognition. *Proc. Natl*  
1052 *Acad. Sci. USA* 102: 123–127.
- 1053 8. Li, Y., Xu, M., Ding, X., Yan, C., Song, Z., Chen, L., Huang, X., Wang, X., Jian, Y., Tang, G et  
1054 al. (2016). Protein kinase C controls lysosome biogenesis independently of mTORC1. *Nat. Cell*  
1055 *Biol.* 18: 1065-1077
- 1056 9. Hoh, B., Hinz, G., Jeong, B. K and Robinson, D.G (1995) Protein storage vacuoles form de  
1057 novo during pea cotyledon development. *J. Cell Sci.* 108: 299-310
- 1058 10. Viotti, C., Krüger, F., Krebs, M., Neubert, C., Fink, F., Lupanga, U., Scheuring, D., Boutté Y.,  
1059 Frescatada-Rosa, M., Wolfenstetter, S., Sauer, N., Hillmer, S., Grebe, M and Schumacher, K  
1060 (2013) The endoplasmic reticulum is the main membrane source for biogenesis of the lytic  
1061 vacuole in *Arabidopsis*. *Plant Cell* 25: 3434–3449.
- 1062 11. Dong, Q. L., Li, Z.W., Xing, X.Y and Chen, B (2011) Discovery of an endophytic  
1063 cyanobacterium in *Haematococcus pluvialis*. *J. Hebei Univ. Technol.* 40: 1-5

- 1064 12. Dong, Q, L., Xing, X.Y., Wu, H.X., Han, Y., Wei, X.L and Zhang, S (2016) Transition of a  
1065 prokaryotic endosymbiotic cyanobacterium into a eukaryotic green alga. Chem. Eng. (China)  
1066 44: 1-6
- 1067 13. Caiola, M. G., Friedmann, R. O and Friedmann, E.I (1993) Cytology of long-term desiccation  
1068 in the desert cyanobacterium *Chroococcidiopsis* (Chroococcales). Phycologia 32: 315-322.
- 1069 14. Billi, D., Friedmann, E. I., Hofer, K.G., Caiola, M.G and Friedmann, R.O (2000)  
1070 Ionizing-radiation resistance in the desiccation-tolerant cyanobacterium *Chroococcidiopsis*.  
1071 Appl. Environ. Microbiol. 66:1489–1492
- 1072 15. Yeates, T. O., Kerfeld, C. A., Heinhorst, S., Cannon, G. C and Shively, J. M (2008)  
1073 Protein-based organelles in bacteria: carboxysomes and related microcompartments. Nat. Rev.  
1074 Microbiol. 6: 681–691
- 1075 16. Allen, M. M (1984) Cyanobacterial cell inclusions. Annu. Rev. Microbiol. 38:1-25.
- 1076 17. Lang, N. J (1968) The fine structure of blue-green algae. Ann. Rev. Microbiol. 22: 15-46.
- 1077 18. Eltsov, M., and Zuber, B (2006) Transmission electron microscopy of the bacterial nucleoid. J.  
1078 Struct. Biol. 156:246–54
- 1079 19. van de Meene, A. M., Hohmann-Marriott, M. F., Vermaas, W. F and Roberson, R. W (2006)  
1080 The three-dimensional structure of the cyanobacterium *Synechocystis* sp. PCC 6803. Arch.  
1081 Microbiol. 184: 259–270
- 1082 20. Peramuna, A and Summers, M. L (2014) Composition and occurrence of lipid droplets in the  
1083 cyanobacterium *Nostoc punctiforme*. Arch. Microbiol. 196: 881–890
- 1084 21. Brédin, C., Kessler, F and van Wijk, K. J (2007) Plastoglobules: versatile lipoprotein  
1085 particles in plastids. Trends plant sci. 12: 260-266
- 1086 22. Austin II, J.R., Frost, E., Vidi, P.A., Kessler, F and Staehelin, L.A (2006) Plastoglobules are  
1087 lipoprotein subcompartments of the chloroplast that are permanently coupled to thylakoid  
1088 membranes and contain biosynthetic enzymes. Plant Cell 18: 1693–1703
- 1089 23. Ytterberg, A. J., Peltier, J., and van Wijk, K. J (2006) Protein profiling of plastoglobules in  
1090 chloroplasts and chromoplasts. A surprising site for differential accumulation of metabolic  
1091 enzymes. Plant Physiol. 140: 984–997
- 1092 24. Vidi, P., Kanwischer, M., Baginsky, S., Austin, J. R., Csucs, G., Dörmann, P., Kessler, F and  
1093 Brédin, C (2006) Tocopherol cyclase (VTE1) localization and vitamin E accumulation in

- 1094 chloroplast plastoglobule lipoprotein particles. *J. Biol. Chem.* 281: 11225–11234
- 1095 25. Lichtenthaler, H. K (2013) Plastoglobuli, thylakoids, chloroplast structure and development of  
1096 plastids. In: Biswal B, Krupinska K, Biswal UC (eds) *Plastid development in leaves during*  
1097 *growth and senescence advances in photosynthesis and respiration.* Springer, Berlin, pp  
1098 337–361.
- 1099 26. Davidi, L., Levin, Y., Ben-Dor, S and Pick, U (2015) Proteome analysis of cytoplasmatic and  
1100 plastidic  $\beta$ -carotene lipid droplets in *Dunaliella bardawil*. *Plant Physiol.* 167: 60–79
- 1101 27. Hobot, J. A., Carlemalm, E., Villiger, W and Kellenberger, E (1984) Periplasmic gel: new  
1102 concept resulting from the reinvestigation of bacterial cell envelope ultrastructure by new  
1103 methods. *J. Bacteriol.* 160:143–152.
- 1104 28. Liberton, M., Berg, R. H., Heuser, J., Roth, R and Pakrasi, H. B (2006) Ultrastructure of the  
1105 membrane systems in the unicellular cyanobacterium *Synechocystis* sp strain PCC 6803.  
1106 *Protoplasma* 227: 129–138
- 1107 29. Samuels, A. L., Giddings, T. H and Staehelin, L. A (1995) Cytokinesis in tobacco BY-2 and  
1108 root tip cells: a new model of cell plate formation in higher plants. *J. Cell Biol.* 130:  
1109 1345–1357
- 1110 30. Rippka, R., Waterbury, J and Cohen-Bazire, G (1974) A cyanobacterium which lacks  
1111 thylakoids. *Arch. Microbiol.* 100: 419–436.
- 1112 31. Rexroth, S., Mullineaux, C. W., Ellinger, D., Sendtko, E., Rögner, M and Koenig, F (2011)  
1113 The plasma membrane of the cyanobacterium *Gloeobacter violaceus* contains segregated  
1114 bioenergetic domains. *Plant Cell* 23: 2379–2390.
- 1115 32. Hoiczky, E and Hansel, A (2000) Cyanobacterial cell walls: news from an unusual prokaryotic  
1116 envelope. *J. Bacteriol.* 182: 1191-1199
- 1117 33. Simon, R. D (1971) Cyanophycin granules form the blue-green alga *Anabaena cylindrica*: a  
1118 reserve material consisting of copolymers of aspartic acid and arginine. *Proc. Natl. Acad. Sci.*  
1119 *USA* 68:265–267.
- 1120 34. Gantt, E and Conti, S. F (1969) Ultrastructure of blue-green algae. *J. Bacteriol.* 97: 1486-1493
- 1121 35. Alvarez, H. M., Mayer, F., Fabritius, D and Steinbüchel, A (1996) Formation of  
1122 intracytoplasmic lipid inclusions by *Rhodococcus opacus* strain PD630. *Arch. Microbiol.*  
1123 165:377–386

- 1124 36. Woodcock, C.L.F., Frado, L.L.Y and Rattner, J.B (1984) The higher order structure of  
1125 chromatin: evidence for a helical ribbon arrangement. *J. Cell Biol.* 99: 42–52.
- 1126 37. Gibbs, S.P (1962) The ultrastructure of the pyrenoids of green algae. *J. Ultra. Res.* 7: 262-272.
- 1127 38. Hay, E. D and Revel, J.P (1963) The fine structure of the DNP component of the nucleus. *J.*  
1128 *Cell Biol.* 16:29-51
- 1129 39. Forbes, D. J., Kirschner, M.W and Newport, J.W (1983) Spontaneous formation of  
1130 nucleus-like structures around bacteriophage DNA microinjected into *Xenopus* eggs. *Cell*  
1131 34:13–23
- 1132 40. Lohka, M. J and Masui, Y (1984) Roles of Cytosol and cytoplasmic particles in nuclear  
1133 envelope assemble and sperm pronuclear formation in cell-free preparations from amphibian  
1134 eggs. *J. Cell Biol.* 98:1222-1230.
- 1135 41. Hagen, C., Siegmund, S and Braune, W (2002) Ultrastructural and chemical changes in the  
1136 cell wall of *Haematococcus pluvialis* (Volvocales, Chlorophyta) during aplanospore  
1137 formation. *Eur. J. Phycol.* 37: 217–226.
- 1138 42. Burczyk, J and Hesse, M (1981) The ultrastructure of the outer cell wall-layer of *Chlorella*  
1139 mutants with and without sporopollenin. *Plant Syst Evol* 138:121–137.
- 1140 43. Scholz, M.J., Weiss, T.L., Jinkerson, R.E., Jing, J., Roth, R., Goodenough, U., Posewitz, M.C  
1141 and Gerken, H.G (2014) Ultrastructure and Composition of the *Nannochloropsis*  
1142 *gaditana* Cell Wall. *Eukaryotic Cell.* 13: 1450–1464.
- 1143 44. Baudelet, P. H., Ricochon, G., Linder, M and Muniglia, L (2017) A new insight into cell walls  
1144 of Chlorophyta. *Algal Res.* 25: 333–371
- 1145 45. Damiani, M.C., Leonardi, P.I., Pieroni, O., Cáceres, E.J (2006) Ultrastructure of the cyst wall  
1146 of *Haematococcus pluvialis* (Chlorophyceae): wall development and behaviour during cyst  
1147 germination. *Phycologia* 45: 616–623
- 1148 46. Paquet, V.E., Lessire, R., Domergue, F., Fouillen, L., Filion, G., Sedighi, A and Charette, S.J  
1149 (2013) Lipid composition of multilamellar bodies secreted by *Dictyostelium discoideum*  
1150 reveals their Amoebal origin. *Eukaryotic Cell* 12: 1326–1334.
- 1151 47. van Doorn, W. G., Kirasak, K and Ketsa, S (2015) Macroautophagy and microautophagy in  
1152 relation to vacuole formation in mesophyll cells of *Dendrobium tepals*. *J. Plant Physiol.* 177:  
1153 67–73

- 1154 48. Nickel, W and Rabouille, C (2009) Mechanisms of regulated unconventional protein secretion.  
1155 Nat. Rev. Mol. Cell Biol. 10:234-255
- 1156 49. Ding, Y., Wang, J., Wang, J.Q., Stierhof, Y. D., Robinson, D. G and Jiang, L. W (2012)  
1157 Unconventional protein secretion. Trends Plant Sci. 17:606-615
- 1158 50. Zhang, M and Schekman, R (2013) Cell biology. Unconventional secretion, unconventional  
1159 solutions. Science 340:559-561.
- 1160 51. Lemasson. C., Marsac, N. T and Cohen-Bazire, G (1973) Role of allophycocyanin as a  
1161 light-harvesting pigment in cyanobacteria. Proc. Nat. Acad. Sci. USA 70: 3130-3133.
- 1162 52. Govindjee, and Rabinowitch, E (1960) Two forms of chlorophyll a in vivo with distinct  
1163 photochemical functions. Science 132: 355-356.
- 1164 53. Gantt, E., Lipschultz, C. A., Grabowski, J and Zimmerman, B .K. (1979) Phycobilisomes from  
1165 blue-green and red algae: isolation criteria and dissociation characteristics. Plant Physiol. 63:  
1166 615–620.
- 1167 54. Thorne, S.W., Newcomb, E.H and Osmond, C.B (1977) Identification of chlorophyll b in  
1168 extracts of prokaryotic algae by fluorescence spectroscopy. Proc. Natl. Acad. Sci. USA 74:  
1169 575–578.
- 1170 55. Lichtenthaler, H. K (1987) Chlorophylls and carotenoids: pigments of photosynthetic  
1171 biomembranes. Methods Enzymol. 148: 350–382.
- 1172 56. Bradbeer, J. W., Atkinson, Y. E., Borner, T., Hagemann, R (1979) Cytoplasmic synthesis of  
1173 plastid polypeptides may be controlled by plastid-synthesised RNA. Nature 279: 816–817.
- 1174 57. Chan, K.X., Phua, S.Y., Crisp, P., McQuinn, R., Pogson, B. J (2016) Learning the languages of  
1175 the chloroplast: retrograde signaling and beyond .Annu. Rev. Plant Biol. 67:25–53
- 1176 58. De Souza, A., Wang, J. Z and Dehesh, K (2017) Retrograde signals: integrators of  
1177 interorganellar communication and orchestrators of plant development. Annu. Rev. Plant Biol.  
1178 68:1.1–1.24.
- 1179 59. Hedtke, B., Wagner, I., Börner, T and Hess, W. R (1999) Inter-organellar crosstalk in higher  
1180 plants: impaired chloroplast development affects mitochondrial gene and transcript levels. Plant  
1181 J 19:635–643
- 1182 60. Gibbs, S. P (1962) Nuclear envelope—chloroplast relationships in algae. J. Cell Biol. 14:  
1183 433-444



- 1184 61. Bouck, G. B (1965) Fine structure and organelle associations in brown algae. *J. Cell Biol.* 26:  
1185 523–537.
- 1186 62. Gantt, E., Edwards, M. R and Provasoli, L (1971) Chloroplast structure of the Cryptophyceae.  
1187 Evidence for phycobiliproteins within intrathylakoidal spaces. *J. Cell Biol.* 48:280-290
- 1188 63. Timmis, J.N., Ayliffe, M.A., Huang, C.Y and Martin, W (2004) Endosymbiotic gene transfer:  
1189 Organelle genomes forge eukaryotic chromosomes. *Nat. Rev. Genet.* 5: 123–135
- 1190 64. Unseld, M., Marienfeld, J.R., Brandt, P and Brennicke, A (1997) The mitochondrial genome of  
1191 *Arabidopsis thaliana* contains 57 genes in 366,924 nucleotides. *Nat Genet* 15:57–61
- 1192 65. Notsu, Y., Masood, S., Nishikawa, T., Kubo, N., Akiduki, G., Nakazono, M., Hirai, A and  
1193 Kadowaki, K. (2002). The complete sequence of the rice (*Oryza sativa* L.) mitochondrial  
1194 genome: frequent DNA sequence acquisition and loss during the evolution of flowering plants.  
1195 *Mol. Genet. Genomics* 268: 434–445.
- 1196 66. Alverson, A.J., Wei, X.X., Rice, D.W., Stern, D.B., Barry, K and Palmer, J.D (2010) Insights  
1197 into the evolution of mitochondrial genome size from complete sequences of *Citrullus lanatus*  
1198 and *Cucurbita pepo* (Cucurbitaceae). *Molecular Biology and Evolution* 27:1436–1448.
- 1199 67. Knox EB (2014) The dynamic history of plastid genomes in the *Campanulaceae sensu lato* is  
1200 unique among angiosperms. *Proc Natl Acad Sci USA* 111:11097–11102.
- 1201 68. Spooner, D. M., Ruess, H., Iorizzo, M., Senalik, D and Simon, P (2017) Entire plastid  
1202 phylogeny of the carrot genus (*Daucus*, Apiaceae): Concordance with nuclear data and  
1203 mitochondrial and nuclear DNA insertions to the plastid. *Am. J. Bot.* 104: 296–312
- 1204 69. Goremykin VV, Salamini F, Velasco R, Viola R. (2009) Mitochondrial DNA of *Vitis vinifera*  
1205 and the issue of rampant horizontal gene transfer. *Mol. Biol. Evol.* 26:99–110.
- 1206 70. Iorizzo, M., Grzebelus, D., Senalik, D., Szklarczyk, M., Spooner, D and Simon, P (2012)  
1207 Against the traffic: the first evidence for mitochondrial DNA transfer into the plastid genome.  
1208 *Mob Genet Elements.* 2: 261–266.
- 1209 71. Straub, S.C.K., Cronn, R.C., Edwards, C., Fishbein, M and Liston, A (2013) Horizontal transfer  
1210 of DNA from the mitochondrial to the plastid genome and its subsequent evolution in  
1211 milkweeds (apocynaceae). *Genome Biol Evol* 5:1872–1885.
- 1212 72. Allfrey, V.G., Mirsky, A.E and Osawa, S (1955) Protein synthesis in isolated cell nuclei. *Nature*  
1213 176:1042–1049

- 1214 73. Iborra ,F.J., Jackson, D.A and Cook, P.R (2001) Coupled transcription and translation within  
1215 nuclei of mammalian cells. *Science* 293:1139–1142
- 1216 74. Dolan, B.P., Knowlton, J.J., David, A., Bennink, J.R and Yewdell, J.W (2010) RNA  
1217 polymerase II inhibitors dissociate antigenic peptide generation from normal viral protein  
1218 synthesis: A role for nuclear translation in defective ribosomal product synthesis? *J Immunol*  
1219 185: 6728–6733
- 1220 75. David, A., Dolan, B.P., Hickman, H.D., Knowlton, J.J., Clavarino, G., Pierre, P., Bennink, J.R  
1221 and Yewdell, J.W (2012) Nuclear translation visualized by ribosome-bound nascent chain  
1222 puromycylation. *J Cell Biol* 197:45–57.
- 1223 76. Apcher, S., Millot, G., Daskalogianni, C., Scherl, A., Manoury, B and Fåhræus, R (2013)  
1224 Translation of pre-spliced RNAs in the nuclear compartment generates peptides for the MHC  
1225 class I pathway. *Proc Natl Acad Sci USA* 110:17951–17956.
- 1226 77. Baboo, S., Bhushan, B., Jiang, H., Grovenor, C.R., Pierre, P., Davis, B.G. and Cook, P.R. (2014)  
1227 Most human proteins made in both nucleus and cytoplasm turn over within minutes. *PLoS One*,  
1228 9, e99346.
- 1229 78. Smith, D.R and Keeling, P.J (2015) Mitochondrial and plastid genome architecture:  
1230 Reoccurring themes, but significant differences at the extremes. *Proc Natl Acad Sci USA* 112:  
1231 10177-10184.
- 1232 79. Stern, D.B and Lonsdale, D.M (1982) Mitochondrial and chloroplast genomes of maize have a  
1233 12-kilobase DNA sequence in common. *Nature* 299: 698–702.
- 1234 80. Stern, D.B and Palmer, J.D (1984) Extensive and widespread homologies between  
1235 mitochondrial DNA and chloroplast DNA in plants. *Proc Natl Acad Sci USA* 81:1946-1950.
- 1236 81. Lacoste-Royal, G and Gibbs, S.P (1985) *Ochromonas* mitochondria contain a specific  
1237 chloroplast protein. *Proc Natl Acad Sci USA* 82: 1456-1459.
- 1238 82. Bennoun P (1982) Evidence for a respiratory chain in the chloroplast. *Proc Natl Acad Sci USA*  
1239 79: 4352–4356.
- 1240 83. Peltier, G, Ravenel, J and Vermeiglio, A (1987) Inhibition of a respiratory activity by short  
1241 saturating flashes in *Chlamydomonas*: evidence for a chlororespiration. *Biochim Biophys Acta*  
1242 893: 83–90.
- 1243 84. Vesk, M., Mercer, F. V. and Possingham, J. V. (1965) Observations on the origin of chloroplast

- 1244 and mitochondria in the leaf cells of higher plants. Aust. J. Bot. 13: 161-169.
- 1245 85. Ballantine, J. E. M. and Forde, B. J. (1970) The effect of light intensity and temperature on  
1246 chloroplast ultrastructure in soybean. Amer. J. Bot. 52: 1150-1159.
- 1247 86. Montes, G. and Bradbeer, J. W. (1976) An association of chloroplasts and mitochondria in *Zea*  
1248 *mays* and *Hyptis suaveolens*. Plant Sci. Lett. 6: 35-41.
- 1249 87. Brown, R.H., Bouton, J.H., Rigsby, L and Rigler, M (1983) Photosynthesis of grass species  
1250 differing in carbon dioxide fixation pathways. VIII. Ultrastructural characteristics of *Panicum*  
1251 species in the Laxa group. Plant Physiol. 71: 425-431
- 1252 88. Brown, R.H., Rigsby, L.L and Akin, D.E. (1983). Enclosure of mitochondria by chloroplasts.  
1253 Plant Physiol. 71, 437-439.
- 1254 89. Carvalho, A.O., Da Cunha, M., Rodrigues, R., Sudré C.P., Santos, I.S., Fernandes, K.V.S.,  
1255 Rabelo, GR and Gomes, V.M (2011) Ultrastructural changes during early infection of *Vigna*  
1256 *unguiculata* and *Phaseolus vulgaris* leaves by *Xanthomonas axonopodis* pv. phaseoli and an  
1257 unexpected association between chloroplast and mitochondrion. Acta Physiologiae Plantarum  
1258 33:2025–2033
- 1259 90. Wildman, S. G., Hongladarom, T and Honda, S. I (1962) Chloroplasts and mitochondria in  
1260 living plant cells: cinephotomicrographic studies. Science 138: 434-435.
- 1261 91. Valanne, N and Valanne, T (1972) Structure of plastids of variegated *Betula pubescens* mutant.  
1262 Canad. Journ. Bot. 50: 1835-1839.
- 1263 92. Bonzi, L.M and Fabbri F (1975) Chloroplast protrusions in *Arisarum proboscideum* (L.) Savi.  
1264 Caryologia 28: 407-426.
- 1265 93. Zhuang, X., Chung, K.P., Cui, Y., Lin, W., Gao, C., Kang, B.H and Jiang, L (2017) ATG9  
1266 regulates autophagosome progression from the endoplasmic reticulum in *Arabidopsis*. Proc  
1267 Natl Acad Sci USA 114: E426–E435.
- 1268 94. Marty, F (1999) Plant vacuoles. Plant Cell 11: 587–600.
- 1269 95. Ragetli, H. W. J., Weintraub, M and Lo, E (1970) Degeneration of leaf cells resulting from  
1270 starvation after excision. I. Electron microscope observations. Can J Bot 48: 1913-1922.
- 1271 96. Aubert, S., Gout, E., Bligny, R., Marty-Mazars, D., Barrieu, F., Alabouvette, J., Marty, F and  
1272 Douce, R (1996) Ultrastructural and biochemical characterization of autophagy in higher plant  
1273 cells subjected to carbon deprivation: control by the supply of mitochondria with respiratory

- 1274 substrates. *J. Cell Biol.* 133: 1251-1263.
- 1275 97. Ris. H and Singh, R. N (1961) Electron microscope studies on blue-green algae. *J. Biophys.*  
1276 *Biochein. Cytol.* 9: 63-80.
- 1277 98. Peat, A and Whitton, B.A (1967) Environmental effects on the structure of the blue-green Alga,  
1278 *Chlorogloea fritschii*. *Archiv für Mikrobiologie* 57: 155-180
- 1279 99. Edwards, M. R., Berns, D. S., Ghiorse, W. C and Holt, S. C (1968) Ultrastructure of the  
1280 thermophilic blue-green alga, *Synechococcus lividus* Copeland. *J. Phycol.* 4 :283-298 .
- 1281 100. Miller, M.M and Lang, N.G (1968) The fine structure of akinete formation and germination  
1282 in *Cylindrospermum*. *Archiv für Mikrobiologie* 60: 303-313.
- 1283 101. van Wijk, K.J and Kessler, F (2017) Plastoglobuli: plastid microcompartments with  
1284 integrated functions in metabolism, plastid developmental transitions, and environmental  
1285 adaptation. *Annu. Rev. Plant Biol.* 68:11.1–11.37
- 1286 102. Menzel, K and Wild, A (1989) A comparative ultrastructural investigation of some  
1287 *Nannochloris species* (Chlorococcales) with particular references to the systematic position of  
1288 *Nanochlorum eucaryotum*. *Botanica Acta* 102: 152-158.
- 1289 103. Somogyi, B., Felföldi, T., Solymosi, K., Makk, J., Homonnay, Z.G., Horváth, G., Turcsi, E.,  
1290 Böddi, B., Márialigeti, K and Vörös, L (2011) *Chloroparva pannonica* gen. et sp. nov. 15  
1291 (Trebouxiophyceae, Chlorophyta) - a new picoplanktonic green alga from a turbid, shallow  
1292 soda pan. *Phycologia* 50:1–10
- 1293 104. Somogyi, B., Felföldi, T., Solymosi, K., Flieger, K., Márialigeti, K., Böddi, B and Vörös, L  
1294 (2013) One step closer to eliminating nomenclatural problems of minute coccoid green algae:  
1295 *Pseudochloris wilhelmii* gen. et sp. nov. (Trebouxiophyceae, Chlorophyta) *Eur J Phycol* 48:  
1296 427–436
- 1297 105. Vieler, A., et al. (2012). Genome, functional gene annotation, and nuclear transformation of  
1298 the heterokont oleaginous alga *Nannochloropsis oceanica* CCMP1779. *PLoS Genet.* 8:  
1299 e1003064.
- 1300 106. Atkinson, A.W., Gunning, B.E and John, P.C.L. (1972) Sporopollenin in the cell wall of  
1301 *Chlorella* and other algae: ultrastructure, chemistry, and incorporation of <sup>14</sup>C-acetate, studied  
1302 in synchronous cultures. *Planta.* 107:1-32.
- 1303 107. Pyliotis, N.A., Goodchild, D.J and Grimme, L.H (1975) The regreening of nitrogen deficient

- 1304 *Chlorella fusca*. II. Structural changes during synchronous regreening. Arch Microbiol 103:  
1305 259 - 270
- 1306 108. G ärtner, G., Uzunov, B., Ingolic, E., Kofler, W., Gacheva, G., Pilarski, P., Zagorchev, L.,  
1307 Odjakova, M and Stoyneva, M (2015) Microscopic investigations (LM, TEM and SEM) and  
1308 identification of *Chlorella* isolate R-06/2 from extreme habitat in Bulgaria with strong  
1309 biological activity and resistance to environmental stress factors, Biotechnol. Biotechnol.  
1310 Equip. 29:536–540
- 1311 109. Zahn, R.K (1984) A green alga with minimal eukaryotic features: *Nanochlorum eucaryotum*.  
1312 Origins of Life 13:289-303.
- 1313 110. Eikrem, W and Thronsen, J (1990) The ultrastructure of *Bathycoccus* gen. nov. and *B.*  
1314 *prasinus* sp. nov., a non-motile picoplanktonic alga (Chlorophyta, Prasinophyceae) from the  
1315 Mediterranean and Atlantic. Phycologia 29: 344-350.
- 1316 111. Chretiennot-Dinet, M. J., Courties, C., Vaquer, A., Neveux, J., Claustre, H., Lautier, J and  
1317 Machado, M.C (1995) A new marine picoeucaryote: *Ostreococcus tauri* gen. et sp. nov.  
1318 (Chlorophyta, Prasinophyceae). Phycologia 34:285–292.
- 1319 112. Krienitz, L., Huss, V.A.R. and Hummer, C (1996) Picoplanktonic *Choricystis* species  
1320 (Chlorococcales, Chlorophyta) and problems surrounding the morphologically similar  
1321 'Nannochloris-like algae'. Phycologia 35: 332-341.
- 1322 113. Krienitz, L., Takeda, H and Hepperle, D (1999) Ultrastructure, cell wall composition and  
1323 phylogenetic position of *Pseudodictyosphaerium jurisii* (Chlorophyta, Chlorococcales)  
1324 including a comparison with other picoplanktonic green algae. Phycologia 38: 100-107.
- 1325 114. Lewin, R. A., Krienitz, L., Goericke, R., Takeda, H and Hepperle, D (2000) *Picocystis*  
1326 *salinarum* gen. et sp. nov. (Chlorophyta)—a new picoplanktonic green alga. Phycologia  
1327 39:560–565.
- 1328 115. Belykh, O. I., Semenova, E.A., Kuznedelov, K.D., Zaika, E.I and Guselnikova, N. E. (2000)  
1329 A eukaryotic alga from picoplankton of Lake Baikal: morphology, ultrastructure and rDNA  
1330 sequence data. Hydrobiologia 435: 83–90.
- 1331 116. Hanagata, N., Malinsky-Rushansky, M and Dubinsky, Z (1999) Eukaryotic picoplankton,  
1332 *Mychonastes homosphaera* (Chlorophyceae, Chlorophyta), in Lake Kinneret, Israel.  
1333 Phycological Research 47: 263–269.

- 1334 117. Henley, W. J., Hironaka, J. L., Guillou, L., Buchheim, M. A., Buchheim, J. A., Fawley, M. W  
1335 and Fawley, K.P (2004) Phylogenetic analysis of the ‘*Nannochloris*-like’ algae and diagnoses  
1336 of *Picochlorum oklahomensis* gen. et sp. nov. (Trebouxiophyceae, Chlorophyta). *Phycologia*  
1337 43: 641–652.
- 1338 118. Karnkowska, A., Vacek, V., Zubáčová, Z., Treitli, S.C., Petrželková, R., Eme, L., Novák, L.,  
1339 Žárský, V., Barlow, L.D., Herman, E.K., et al. (2016). A eukaryote without a mitochondrial  
1340 organelle. *Curr Biol* 26: 1274–1284
- 1341 119. Allard, B., Rager, M and Templier, J (2002) Occurrence of high molecular weight lipids (C80+)  
1342 in the trilaminar outer cell walls of some freshwater microalgae. A reappraisal of algaenan  
1343 structure. *Org Geochem.* 33: 789-801.
- 1344 120. Gelin, F., Volkman, J.K., Largeau, C., Derenne, S., Damste, J.S.S and De Leeuw, J.W (1999)  
1345 Distribution of aliphatic, nonhydrolyzable biopolymers in marine microalgae. *Org Geochem.*  
1346 30:147–159.
- 1347 121. Kodner, R.B., Surnmons, R.E and Knoll, A.H (2009) Phylogenetic investigation of the  
1348 aliphatic, non-hydrolyzable biopolymer algaenan, with a focus on green algae. *Org. Geochem.*  
1349 40:854–862.
- 1350 122. Rashidi, B and Trindade, L.M (2018) Detailed biochemical and morphologic characteristics  
1351 of the green microalga *Neochloris oleoabundans* cell wall. *Algal research* 35: 152-159
- 1352 123. Burczyk, J and Loos, E (1995) Cell wall-bound enzymatic activities in *Chlorella* and  
1353 *Scenedesmus*. *J Plant Physiol* 146: 748–750
- 1354 124. Matagne, R.F., Loppes, R and Deltour, R (1976) Phosphatases of *Chlamydomonas reinhardtii*:  
1355 biochemical and cytochemical approach with specific mutants. *J Bacteriol* 126: 937-950
- 1356 125. Loos, E and Meindle, D (1985) Cell-wall-bound lytic activity in *Chlorella fusca*: function  
1357 and characterization of an endomannanase. *Planta (Bed.)*. 166:557-562
- 1358 126. Satoh, H and Takeda, H (1989) Detection and first characterisation of a cell wall lytic activity  
1359 in *Chlorella ellipsoidea* C-27. *Physiol Plant* 77: 20-26
- 1360 127. Burczyk, J., Szkawran, H., Zontek, I and Czygan, F.C (1981) Carotenoids in the outer cell  
1361 wall layer of *Scenedesmus* (Chlorophyceae). *Planta* 151:247–250.
- 1362 128. Burczyk, J (1987) Cell wall carotenoids in green algae that form sporopollenin.  
1363 *Phytochemistry* 26: 121–128.

- 1364 129. Martinière, A., et al. (2012) Cell wall constrains lateral diffusion of plant plasma-membrane  
1365 proteins. Proc Natl Acad Sci 109:12805-12810.
- 1366 130. Beveridge, T.J (1999) Structures of gram-negative cell walls and their derived membrane  
1367 vesicles. J Bacteriol 181: 4725–4733.
- 1368 131. Guerra-Guimaraes, L., Pinheiro, C., Chaves, I., Barros, D.R and Ricardo, C.P (2016) Protein  
1369 dynamics in the plant extracellular space. Proteomes 4: 22.
- 1370 132. Chiba, A., Ishida, H., Nishizawa, N.K., Makino, A and Mae, T (2003) Exclusion of  
1371 ribulose-1,5-bisphosphate carboxylase/oxygenase from chloroplasts by specific bodies in  
1372 naturally senescing leaves of wheat. Plant Cell Physiol. 44: 914–921.
- 1373 133. Honig, A., Avin-Wittenberg, T., Ufaz, S and Galili, G (2012) A new type of compartment,  
1374 defined by plant-specific Atg8-interacting proteins, is induced upon exposure of Arabidopsis  
1375 plants to carbon starvation. Plant Cell 24: 288–303.
- 1376 134. Wang, Y., Yu, B., Zhao, J., Guo, J., Li, Y., Han, S., Huang, L., Du, Y., Hong, Y., Tang, D and  
1377 Liu, Y (2013) Autophagy contributes to leaf starch degradation. Plant Cell 25: 1383–1399.
- 1378 135. Otegui, M.S., Noh, Y.S., Martínez, D.E., Vila Petroff, M.G., Staehelin, L.A., Amasino, R.M  
1379 and Guimnet, J.J (2005) Senescence-associated vacuoles with intense proteolytic activity  
1380 develop in leaves of Arabidopsis and soybean. Plant J. 41: 831–844.
- 1381 136. Wang, S and Blumwald, E (2014) Stress-induced chloroplast degradation in *Arabidopsis* is  
1382 regulated via a process independent of autophagy and senescence-associated vacuoles. Plant  
1383 Cell 26: 4875–4888.
- 1384 137. Hoffman, H and Grigg, G. W (1958) An electron microscopic study of mitochondria  
1385 formation. Exp. Cell Res. 15: 118-131.
- 1386 138. Brandes, D., Schofield, B. H and Anton, E (1965) Nuclear mitochondria? Science 149:  
1387 1373-1374.
- 1388 139. Matsuyama, M and Suzuki, H (1972) Seizing mechanism and fate of intranuclear  
1389 mitochondria. Experientia 28:1347–1348.
- 1390 140. Oliva, H., Valle, A., Díaz Flores, L and Rivas, M. C (1973) Intranuclear Mitochondriae in  
1391 Hodgkin's Disease. Virchows Arch. Abt. B Zellpath. 12: 189-194.
- 1392 141. Jensen, H., Engedal, H and Selmer Satersdal, T (1976) Ultrastructure of  
1393 mitochondria-containing nuclei in human myocardial cells. Virchows Arch. B Cell Path. 21:

- 1394 1-12
- 1395 142. Bakeeva, L.E., Skulachev, V.P., Sudarikova, Yu.V., Tsyplenkova, V.G (2001) Mitochondria  
1396 enter the nucleus (one further problem in chronic alcoholism). *Biochemistry (Mosc)*.  
1397 66:1335–1341.
- 1398 143. Kristensen, T and Prydz, H (1986) The presence of intact mitochondrial DNA in HeLa cell  
1399 nuclei. *Nucleic Acids Res*. 14: 2597-2609.
- 1400 144. Hirano, T., Shiraishi, K., Adachi, K., Miura, S., Watanabe, H and Utiyama, H (1999)  
1401 Co-localization of mitochondrial and double minute DNA in the nuclei of HL-60 cells but not  
1402 normal cells. *Mutat Res* 425: 195-204.
- 1403 145. Hazkani-Covo, E., Zeller, R.M., Martin, W (2010) Molecular poltergeists: mitochondrial  
1404 DNA copies (*numts*) in sequenced nuclear genomes. *PLoS Genet* 6(2): e1000834
- 1405 146. Karlberg, O., Canbäck, B., Kurland, C.G., Andersson, S.G.E (2000) The dual origin of the  
1406 yeast mitochondrial proteome. *Yeast* 17:170–187
- 1407 147. Gabaldón, T and Huynen, M.A (2003) Reconstruction of the proto-mitochondrial metabolism,  
1408 *Science* 301: 609.
- 1409 148. Gray, M.W (2015) Mosaic nature of the mitochondrial proteome: Implications for the origin  
1410 and evolution of mitochondria. *Proc Natl Acad Sci USA* 112:10133–10138.
- 1411 149. Walen, K.H (2002) The origin of transformed cells: studies of spontaneous and induced in cell  
1412 cultures from marsupials, a snail and human amniocytes. *Cancer Genet Cytogenet*. 133:45–54.
- 1413 150. Walen, K.H (2004) Spontaneous cell transformation: karyoplasts derived from multinucleated  
1414 cells produce new cell growth in senescent human epithelial cell cultures. *Vitro Cell Dev Biol*  
1415 *Anim*. 40:150–158
- 1416 151. Sundaram, M., Guernsey, D.L., Rajaraman, M.M and Rajaraman, R.R (2004) Neosis: a  
1417 novel type of cell division in cancer. *Cancer Biol Therap*. 3:207–218
- 1418 152. Leikam, C., Hufnagel, A.L., Otto, C., Murphy, D.J., Mühlhling, B., Kneitz, S., Nanda, I.,  
1419 Schmid, M., Wagner, T.U., Haferkamp, S., Bröcker, E.B., Scharl, M and Meierjohann, S  
1420 (2015) In vitro evidence for senescent multinucleated melanocytes as a source for  
1421 tumor-initiating cells. *Cell Death Dis*. 6:e1711.
- 1422 153. Zhang, S., Mercado-Uribe, I., Sood, A., Bast, R.C and Liu, J (2016) Coevolution of  
1423 neoplastic epithelial cells and multilineage stroma via polyploid giant cells during



- 1424 immortalization and transformation of mullerian epithelial cells. *Genes Cancer*. 7:60–72.
- 1425 154. Buikis, I., Harju, L and Freivalds, T (1999) Origin of microcells in human sarcoma cell line  
1426 HT1080. *Anal Cell Pathol*. 18:73–85.
- 1427 155. Erenpreisa, J., Cragg, M., Fringes, B., Sharakhov, I and Illidge, T (2000) Release of mitotic  
1428 descendents by giant cells from irradiated Burkitt’s lymphoma cell line. *Cell Biol Int*.  
1429 24:635–648.
- 1430 156. Puig, P.E., Guilly, M.N., Bouchot, A., Droin, N., Cathelin, D., Bouyer, F., et al. (2008) Tumor  
1431 cells can escape DNA-damaging cisplatin through DNA endoreduplication and reversible  
1432 polyploidy. *Cell Biol Int*. 32:1031–1043.
- 1433 157. Ianzini, F., Kosmacek, E.A., Nelson, E.S., Napoli, E., Erenpreisa, J., Kalejs, M and Mackey  
1434 M.A (2009) Activation of meiosis-specific genes is associated with depolyploidization of  
1435 human tumor cells following radiation-induced mitotic catastrophe. *Cancer Res*.  
1436 69:2296–2304.
- 1437 158. Weihua, Z., Lin, Q., Ramoth, A.J., Fan, D and Fidler, I.J (2011) Formation of solid tumors by  
1438 a single multinucleated cancer cell. *Cancer* 117:4092–4099.
- 1439 159. Zhang, S., Mercado-Uribe, I., Liu, J (2013) Generation of erythroid cells from fibroblasts and  
1440 cancer cells *in vitro* and *in vivo*. *Cancer Lett*. 333:205–212.
- 1441 160. Niu, N., Zhang, J., Zhang, N., Mercado-Uribe, I., Tao, F., Han, Z., et al (2016) Linking  
1442 genomic reorganization to tumor initiation via the giant cell cycle. *Oncogenesis*. 5:e281.
- 1443 161. Niu, N., Mercado-Uribe, I., Liu, J (2017) Dedifferentiation into blastomere-like cancer stem  
1444 cells via formation of polyploid giant cancer cells. *Oncogene*. 36:4887–4900
- 1445 162. Zhang, D., Yang, X., Yang, Z., Fei, F., Li, S., Qu, J., Zhang, M., Li, Y., Zhang, X and Zhang,  
1446 S (2017) Daughter cells and erythroid cells budding from pgccs and their clinicopathological  
1447 significances in colorectal cancer. *J Cancer*. 8:469–478.
- 1448 163. Woodworth, C. D., Bowden, P. E., Doninger, J., Pirisi, L., Barnes, W., Lancaster, W. D and  
1449 DiPaolo, J.A (1988) Characterization of normal human exocervical epithelial cells  
1450 immortalized in vitro by papillomavirus types 16 and 18 DNA. *Cancer Res*. 48:4620-4628.
- 1451 164. Romanov, S. R., Kozakiewics, B. K., Hoist, C. R., Stampfei, M. R., Haupt, L. M and Tlsty, T.  
1452 D (2001) Normal human mammary epithelial cells spontaneously escape senescence and  
1453 acquire genomic changes. *Nature* 409:633-637

- 1454 165. Dong, Q, L and Xing, X.Y (2018) Cancer cells arise from bacteria. *Cancer Cell Int.*18:205
- 1455 166. Sagan, L (1967) On the origin of mitosing cells. *J. Theoret. Biol.* 14: 225–274
- 1456 167. Martin, W and Kowallik, K (1999) Annotated English translation of Mereschkowsky's 1905
- 1457 paper 'über Natur und Ursprung der Chromatophoren im Pflanzenreiche'. *Eur. J. Phycol.*
- 1458 34:287–295.
- 1459 168. Zillig, W., Klenk, H-P., Palm, P., Leffers, H., Pühler, G., Gropp, F and Garrett, R.A (1989)
- 1460 Did eukaryotes originate by a fusion event? *Endocyt. Cell Res.* 6, 1–25.
- 1461 169. Lake, J.A and Rivera, M.C (1994) Was the nucleus the first endosymbiont? *Proc Natl Acad*
- 1462 *Sci USA* 91: 2880-2881.
- 1463 170. Gupta, R.S and Golding, G.B (1996) The origin of the eukaryotic cell. *Trends Biochem Sci*
- 1464 21:166-171.
- 1465 171. Stanier, R.Y., Kunisawa, R., Mandel, M and Cohen-Bazire, G (1971). Purification and
- 1466 properties of unicellular blue-green algae (Order Chroococcales). *Bacteriol. Rev.* 35: 171-205.
- 1467 172. Ferris M. J and Hirsch C. F. (1991) Method for isolation and purification of
- 1468 cyanobacteria. *Appl. Environ. Microbiol.* 57:1448–1452.
- 1469 173. Adams, S.M., Kao, O.W and Berns, D.S (1979) Psychrophile C-Phycocyanin. *Plant Physiol.*
- 1470 64: 525–527.
- 1471 174. Garcia-Pichel, F., Nübel, U and Muyzer, G (1998) The phylogeny of unicellular, extremely
- 1472 halotolerant cyanobacteria. *Arch. Microbiol.* 169: 469–482.
- 1473 175. Moore, L. R., Rocap, G and Chisholm, S. W (1998). Physiology and molecular phylogeny of
- 1474 coexisting *Prochlorococcus* ecotypes. *Nature* 393: 464

## 1475 **Acknowledgements**

1476 This work was supported by the Natural Science Foundation of Hebei Province (B2008000029).

1477

1478

1479

1480

## 1481 **List of abbreviations**

|     |                                  |     |                                  |
|-----|----------------------------------|-----|----------------------------------|
| AUG | Autosporangium                   | EW  | Eukaryotic cell wall             |
| C   | Chloroplast                      | FM  | Fibrillar materials              |
| CD  | Chloroplast debris               | GA  | Golgi apparatus                  |
| CE  | Cytoplasmic envelope             | GP  | Globular particles               |
| CF  | Chromatin fibers                 | HGB | Heterogenous globular bodies     |
| CG  | Cyanophycin granules             | IB  | Intranuclear body                |
| CHE | Chloroplast envelope             | ICE | Intracytoplasmic envelope        |
| CLM | Cloudlike materials              | ICP | Inner cytoplasm                  |
| CM  | Cytoplasmic membrane             | IES | Inter envelope space             |
| CPV | Compound vesicles                | IIM | Inner intracytoplasmic membrane  |
| CR  | Cristae                          | IIS | Inner intracytoplasmic space     |
| CV  | Combined vesicles                | INS | Interspace                       |
| CW  | Cell wall                        | IS  | Intracytoplasmic space           |
| CX  | Carboxysomes                     | ITB | Internal body                    |
| DF  | DNA Fibers                       | IV  | Internal vesicle                 |
| DGV | Dense-margined vesicles          | IVS | Invaginated space                |
| DLF | DNA-like fibrils                 | LD  | Lipid droplet                    |
| DMF | Double-layered membrane fragment | LDB | Less electron-dense bodies       |
| DMS | Double-layered membrane segment  | LDM | Less electron-dense materials    |
| DMV | Double-membraned vesicles        | LM  | Limiting membrane                |
| DRV | Dilated ring-shaped vesicles     | M   | Mitochondrion                    |
| DSV | Dense vesicle                    | ME  | Mitochondrial envelope           |
| DT  | DNA threads                      | MF  | Membrane fragments               |
| DV  | Dotted vesicles                  | ML  | Microfibrils                     |
| ED  | Electron-dense debris            | MLB | Multilamellar body               |
| EDV | Electron-dense vesicles          | MR  | Margin residues                  |
| EF  | Electron-dense fibrils           | MS  | Membrane segments                |
| EG  | Electron-dense granules          | MT  | Membranous elements              |
| EIS | Empty Inner space                | MV  | Microvesicles                    |
| EL  | Electron-dense layer             | N   | Nucleus                          |
| ELM | Electron-translucent materials   | NE  | Nuclear envelope                 |
| ELV | Electron-translucent vesicles    | NIC | New inner cytoplasm              |
| EM  | Eukaryotic cytoplasmic matrix    | NIS | New inner intracytoplasmic space |
| EOB | Electron-opaque bodies           | NS  | New intracytoplasmic space       |
| EOP | Electron-opaque particles        | NT  | Nucleoid-like structure          |
| EOM | Electron-opaque materials        | NU  | Nucleoid                         |
| EOV | Electron-opaque vesicles         | NX  | New intracytoplasmic matrix      |
| EP  | Electron-dense particles         | OCP | Outer cytoplasm                  |
| EPM | Electron-transparent materials   | OE  | Outer nuclear envelope           |
| ER  | Endoplasmic reticulum            | OG  | Osmiophilic granules             |
| ES  | Extracytoplasmic space           | OIM | Outer intracytoplasmic membrane  |
| EV  | Electron-transparent vesicle     | OIS | Outer intracytoplasmic space     |

|     |                            |     |                               |
|-----|----------------------------|-----|-------------------------------|
| OPV | Opaque-periphery vesicle   | RV  | Ring-shaped vesicles          |
| OM  | Outer membrane             | SA  | Sporangium                    |
| OV  | Oblong vesicles            | SG  | Starch granules               |
| P   | Peptidoglycan layer        | SH  | Sheath                        |
| PB  | Polyphosphate bodies       | SMV | Smaller vesicles              |
| PC  | Primitive chloroplast      | SM  | Stroma                        |
| PCB | Phycobilisomes             | SOV | Small opaque vesicle          |
| PD  | Pyrenoids                  | SP  | Starch plate                  |
| PG  | Plastoglobuli              | ST  | Secondary thylakoids          |
| PL  | Peptidoglycan-like layer   | SV  | Small vesicles                |
| PMT | Primitive thylakoids       | T   | Thylakoids                    |
| PN  | Primitive nucleus          | TL  | Thylakoid-like structure      |
| PNE | Primitive nuclear envelope | TMF | Two-layered membrane fragment |
| PO  | Pores                      | TMV | Thick margin vesicle          |
| PT  | Primary thylakoids         | TV  | Tiny vesicles                 |
| RB  | Ribosomes                  | V   | Vacuole                       |
| RM  | Residual membranes         | VB  | Vesicle-containing body       |
